# Supplementary material for: An engineered biosensor enables dynamic aspartate measurements in living cells
Source: eLife journal article supplement (doi:10.7554/elife.90024), 2023-08-31
Supplement: fig2-data3 [file elife-90024-fig2-data3-v1.pdf]

Blot 1, scan 1:  
Probed for GOT1 and Vinculin  
(Low resolution, full scan)

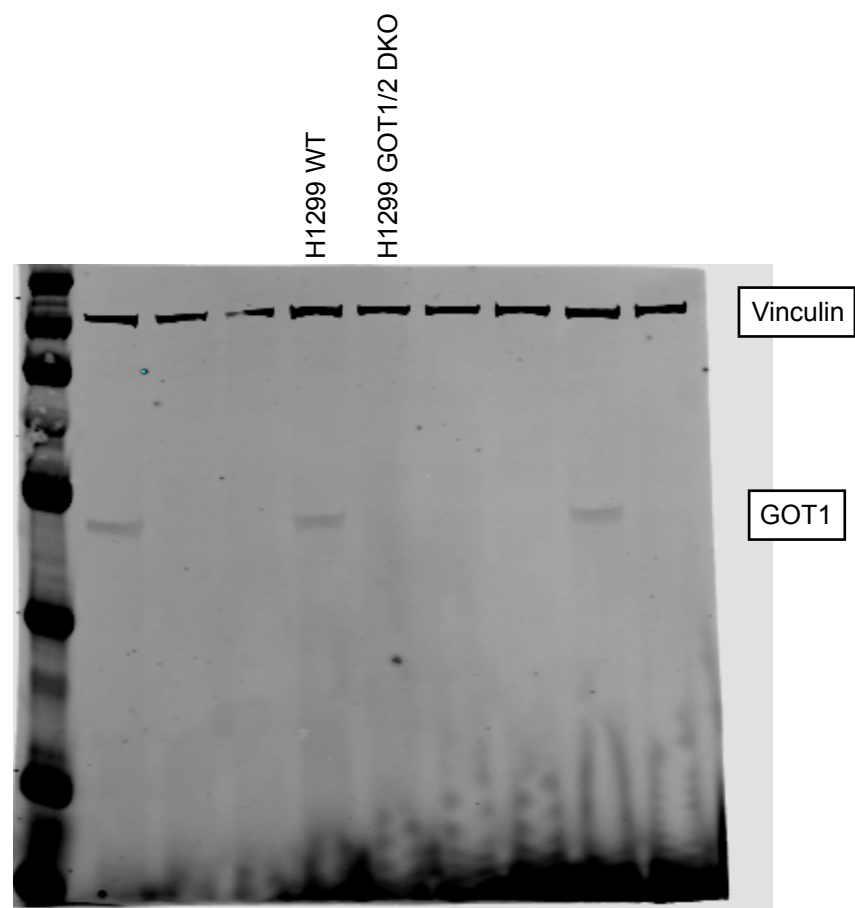

Blot 2, scan 1:  
Probed for GOT2 and Vinculin  
(Low resolution, full scan)

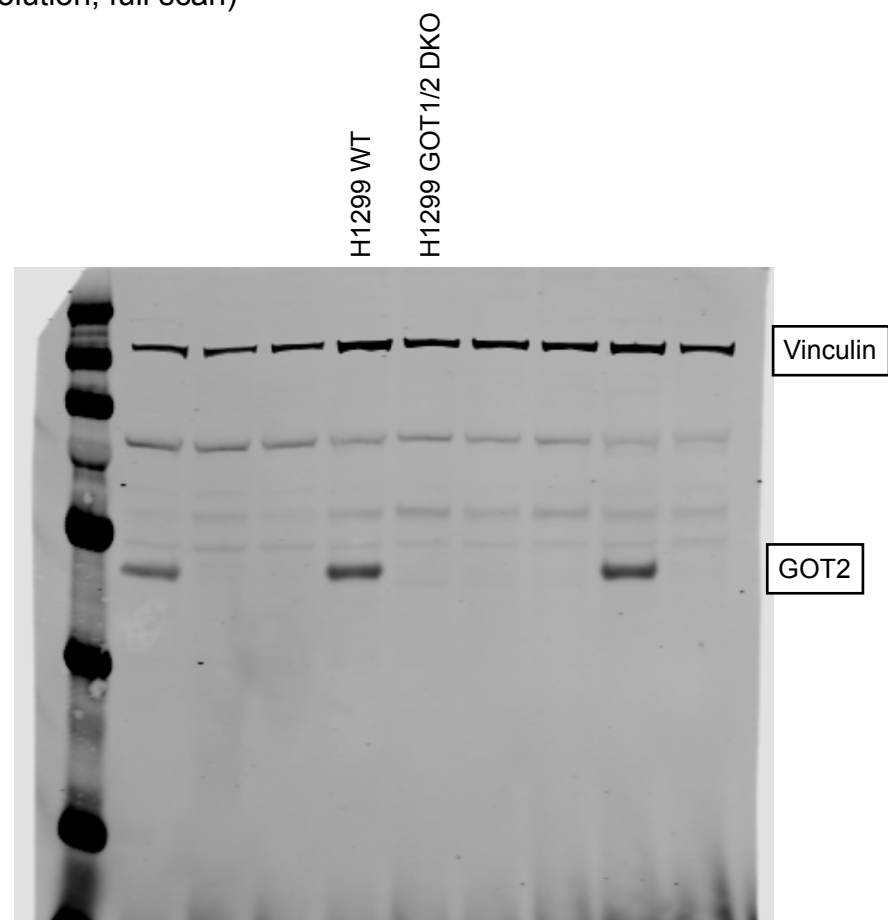

Blot 1, scans 2 & 3:  
Probed for GOT1 and Vinculin  
(High resolution, focused scan)

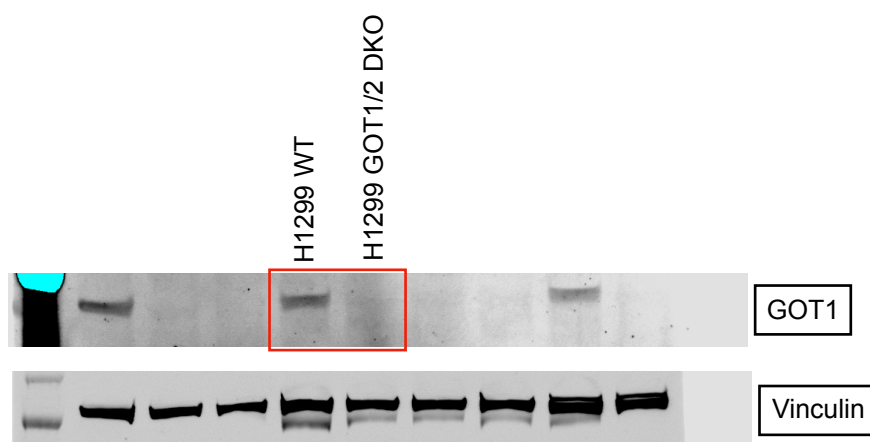

Blot 2, scans 2 & 3:  
Probed for GOT2 and Vinculin  
(High resolution, focused scan)

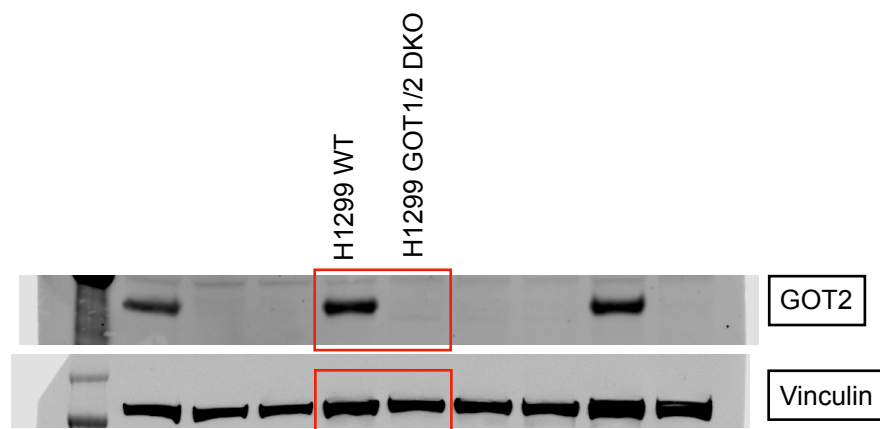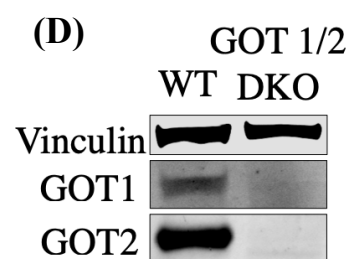

Figure 2
