# Supplementary material for: An engineered biosensor enables dynamic aspartate measurements in living cells
Source: eLife. 2024 Feb 23;12:RP90024. doi: 10.7554/eLife.90024 (PMC10942590; doi:10.7554/eLife.90024)
Supplement: Figure 1—figure supplement 4—source data 1. [file elife-90024-fig1-figsupp4-data1.xlsx]

## Sheet: Sheet1
Upper left panel
∆F/F (fluorescence with ligand - fluorescence without ligand)/fluorescence without ligand. N=1
[Ligand], µM	Ala	Phe	Gly	His	Ile	Leu	Met	Pro	Gln	Arg	Ser	Thr	Val
10000	1.29	2.44	1.98	3.83	1.97	2.14	2.7	0.27	-0.0076046	0.31077	0.77647	1.1473	1.297
3333.3	0.72	1.42	1.05	3.9	1.18	1.25	1.58	0.075472	-0.2956	0.040625	0.46886	0.9734	0.62573
1111.1	0.35	0.77	0.55	3.72	0.56	0.63	0.7	0.004902	-0.32012	-0.11314	0.54802	0.50538	0.029126
370.37	0.22	0.44	0.41	3.85	0.37	0.35	0.37	-0.28685	-0.38323	-0.14453	-0.15441	0.073892	-0.16038
123.46	0.02	0.24	0.21	2.58	0.23	0.09	0.21	-0.23558	-0.26482	-0.18182	-0.11275	-0.011905	-0.1087
41.152	-0.01	0.09	0.11	1.05	0.03	0.06	0.1	-0.19474	-0.22936	-0.096774	-0.23853	-0.019608	-0.14368
13.717	-0.05	0.02	0.02	0.58	0.01	0	0.06	-0.0625	-0.12834	-0.10843	-0.23077	0	-0.12583
4.5725	-0.07	0.02	0	0.25	0.03	0.08	0.1	-0.081633	-0.14689	-0.071429	-0.15263	-0.095238	-0.043478
1.5242	-0.06	0.07	-0.03	0.08	-0.02	0.02	0	-0.0076336	-0.061644	-0.08427	-0.17442	-0.085106	-0.13194
0.50805	-0.09	-0.06	-0.02	-0.03	-0.13	-0.08	-0.05	-0.045455	-0.021127	-0.014599	-0.1195	0.0073529	0.052239
0.16935	-0.07	-0.07	-0.05	-0.12	0.01	-0.13	-0.1	-0.11644	-0.051471	-0.021739	-0.086957	-0.098684	-0.023622
0	-0.11	-0.13	-0.11	-0.11	-0.1	-0.14	-0.08	-0.084416	-0.025	0.0074074	-0.11905	-0.022727	0.089286
Upper right panel
∆F/F (fluorescence with ligand - fluorescence without ligand)/fluorescence without ligand. N=1
	mRuby2-	mRuby3-	mRuby3-	iGlucoSnFR-	jAspSnFR3-
[Histidine], uM	lysate	lysate	HisTag	mRuby3 HisTag	mRuby3-HisTag
10000	0.047122	0.11071	1.1913	0.85901	2.5976
3333.3	0.046998	0.13672	1.4469	0.94639	2.5939
1111.1	0.047683	0.29511	1.8489	1.0273	1.7716
370.37	0.044677	0.20843	1.969	0.87021	1.893
123.46	0.044792	0.078326	1.3332	0.85326	1.4836
41.152	0.052075	0.11542	0.9863	0.62137	1.3589
13.717	0.047847	0.077542	0.59264	0.38994	0.35105
4.5725	0.050781	0.041826	0.16303	0.09733	0.11825
1.5242	0.056905	0.04703	0.0068853	0.06375	0.030949
0.50805	0.050951	0.045268	-0.059356	0.031265	-0.032689
0.16935	0.049625	0.039744	-0.15121	-0.0094269	-0.068975
0	0.052563	0.039099	-0.083956	-0.020231	-0.061547
Lower left panel
∆F/F (fluorescence with ligand - fluorescence without ligand)/fluorescence without ligand. N=1
	mRuby2-	mRuby3-	mRuby3-	iGlucoSnFR-	jAspSnFR3-
[Aspartate], uM	lysate	lysate	HisTag	mRuby3 HisTag	mRuby3-HisTag
10000	0.040428	0.023919	0.53963	0.43578	0.26094
3333.3	0.042156	0.038139	0.91106	0.53094	0.25443
1111.1	0.050357	0.020954	0.70381	0.49953	0.057686
370.37	0.058577	-0.0098024	0.26571	0.23067	-0.2056
123.46	0.0587	-0.026756	0.12227	0.08268	-0.20305
41.152	0.065188	0.010176	0.039582	-0.043278	-0.22429
13.717	0.060148	0.022382	-0.014619	-0.027879	-0.26175
4.5725	0.060803	0.022842	-0.03456	-0.061623	-0.23412
1.5242	0.074373	0.055362	-0.065956	-0.050803	-0.23191
0.50805	0.068082	0.059403	-0.076944	-0.076976	-0.20597
0.16935	0.070595	0.06176	-0.093799	-0.040347	-0.12905
0	0.071508	0.066984	-0.075582	-0.02777	-0.061298
Lower right panel
∆F/F (fluorescence with ligand - fluorescence without ligand)/fluorescence without ligand. N=1
	mRuby2-	mRuby3-	mRuby3-	iGlucoSnFR-	jAspSnFR3-
[GABA], uM	lysate	lysate	HisTag	mRuby3 HisTag	mRuby3-HisTag
10000	0.027145	-0.0012853	-0.062345	-0.0012829	-0.15215
3333.3	0.037143	0.0067595	-0.038518	0.0024377	-0.10068
1111.1	0.044323	0.049901	0.016493	0.041059	-0.11346
370.37	0.056241	0.04901	0.0095043	0.0396	-0.10697
123.46	0.055355	0.054778	0.028789	0.050529	-0.069007
41.152	0.039491	0.052144	0.033584	0.035211	-0.07494
13.717	0.048988	0.048653	-0.00081378	0.053542	-0.076428
4.5725	0.048262	0.03799	0.0046897	0.051332	-0.080335
1.5242	0.054955	0.062073	-0.0047876	0.057391	-0.082724
0.50805	0.037973	0.046945	0.013204	0.036852	-0.073628
0.16935	0.021166	0.041145	-0.048876	0.040181	-0.086799
0	0.053912	0.064352	-0.020797	0.04007	-0.069998
