# Supplementary material for: An engineered biosensor enables dynamic aspartate measurements in living cells
Source: eLife. 2024 Feb 23;12:RP90024. doi: 10.7554/eLife.90024 (PMC10942590; doi:10.7554/eLife.90024)
Supplement: Figure 1—source data 1. [file elife-90024-fig1-data1.xlsx]

## Sheet: Fig1B
∆F/F (fluorescence with ligand - fluorescence without ligand)/fluorescence without ligand. N=3
[Ligand], µM	Aspartate	SD	Glutamate	SD	Asparagine	SD
10000			8.6286	0.42578	9.2335	0.14715
3333.3	20.97	0.31336	5.3577	0.18362	5.5047	0.19652
1111.1	20.178	0.7686	2.2425	0.15473	2.5131	0.17438
370.37	18.989	0.22127	0.85238	0.082288	0.94448	0.06106
123.46	15.84	0.41099	0.36508	0.02681	0.40842	0.019824
41.152	10.851	0.77537	0.17461	0.01291	0.19081	0.0089763
13.717	5.5389	0.11209	0.10878	0.00151	0.11003	0.011813
4.5725	2.5105	0.14171	0.083117	0.0029852	0.086682	0.01098
1.5242	0.99413	0.12968	0.071248	0.01621	0.06439	0.01768
0.50805	0.41854	0.043047	0.054974	0.029835	0.060077	0.0015672
0.16935	0.16196	0.016193	0.071642	0.01499	0.04731	0.0078098
0	0.060391	0.020251	0.06321	0.0036049	0.048921	0.017517
