# Supplementary material for: An engineered biosensor enables dynamic aspartate measurements in living cells
Source: eLife. 2024 Feb 23;12:RP90024. doi: 10.7554/eLife.90024 (PMC10942590; doi:10.7554/eLife.90024)
Supplement: Figure 2—source data 1. [file elife-90024-fig2-data1.xlsx]

## Sheet: 2B
Rotenone (nM)	Time since treatment (h)	GFP/Nuc-RFP (AU)
0	-1.3	1
0	0.5	1.08722
0	4.5	0.961847
0	8.5	0.935927
0	12.5	0.927658
0	16.5	0.938646
0	20.5	0.932425
0	28.5	0.911652
0	32.5	0.9213
0	36.5	0.941329
0	40.5	0.97079
0	43.6333	0.992722
0	46.3667	1.00316
0	-1.3	1
0	0.5	1.05263
0	4.5	0.961219
0	8.5	0.941836
0	12.5	0.9353
0	16.5	0.933561
0	20.5	0.911282
0	28.5	0.895496
0	32.5	0.894478
0	36.5	0.902951
0	40.5	0.935118
0	43.6333	0.975896
0	46.3667	0.990472
0	-1.3	1
0	0.5	1.04806
0	4.5	0.945642
0	8.5	0.920537
0	12.5	0.913154
0	16.5	0.920788
0	20.5	0.921469
0	28.5	0.901814
0	32.5	0.909918
0	36.5	0.936887
0	40.5	0.955346
0	43.6333	0.977493
0	46.3667	0.990251
0	-1.3	1
0	0.5	1.05702
0	4.5	0.981193
0	8.5	0.963727
0	12.5	0.957556
0	16.5	0.94
0	20.5	0.971819
0	28.5	0.979088
0	32.5	0.962921
0	36.5	0.957503
0	40.5	0.960499
0	43.6333	0.998585
0	46.3667	1.00468
7.5	-1.3	1
7.5	0.5	0.995554
7.5	4.5	0.865522
7.5	8.5	0.806473
7.5	12.5	0.759204
7.5	16.5	0.730995
7.5	20.5	0.730382
7.5	28.5	0.700354
7.5	32.5	0.66906
7.5	36.5	0.648054
7.5	40.5	0.65389
7.5	43.6333	0.631031
7.5	46.3667	0.635528
7.5	-1.3	1
7.5	0.5	1.00408
7.5	4.5	0.873454
7.5	8.5	0.813489
7.5	12.5	0.755319
7.5	16.5	0.738917
7.5	20.5	0.716827
7.5	28.5	0.652674
7.5	32.5	0.627471
7.5	36.5	0.599441
7.5	40.5	0.596991
7.5	43.6333	0.585953
7.5	46.3667	0.585473
7.5	-1.3	1
7.5	0.5	1.04054
7.5	4.5	0.855627
7.5	8.5	0.804287
7.5	12.5	0.768919
7.5	16.5	0.747199
7.5	20.5	0.74143
7.5	28.5	0.690656
7.5	32.5	0.6642
7.5	36.5	0.647695
7.5	40.5	0.613322
7.5	43.6333	0.608602
7.5	46.3667	0.599339
7.5	-1.3	1
7.5	0.5	0.996698
7.5	4.5	0.853062
7.5	8.5	0.804666
7.5	12.5	0.782837
7.5	16.5	0.78052
7.5	20.5	0.778865
7.5	28.5	0.746275
7.5	32.5	0.725929
7.5	36.5	0.707912
7.5	40.5	0.69453
7.5	43.6333	0.674084
7.5	46.3667	0.665118
15	-1.3	1
15	0.5	1.00714
15	4.5	0.792914
15	8.5	0.696576
15	12.5	0.626155
15	16.5	0.605984
15	20.5	0.563958
15	28.5	0.486705
15	32.5	0.466503
15	36.5	0.449029
15	40.5	0.429321
15	43.6333	0.415117
15	46.3667	0.407961
15	-1.3	1
15	0.5	0.998286
15	4.5	0.811757
15	8.5	0.728007
15	12.5	0.638616
15	16.5	0.59408
15	20.5	0.568149
15	28.5	0.519929
15	32.5	0.497182
15	36.5	0.469384
15	40.5	0.443927
15	43.6333	0.420351
15	46.3667	0.402367
15	-1.3	1
15	0.5	1.0382
15	4.5	0.793639
15	8.5	0.713323
15	12.5	0.63872
15	16.5	0.593366
15	20.5	0.564051
15	28.5	0.524016
15	32.5	0.485247
15	36.5	0.455217
15	40.5	0.436392
15	43.6333	0.421439
15	46.3667	0.407453
15	-1.3	1
15	0.5	1.04005
15	4.5	0.794282
15	8.5	0.724877
15	12.5	0.667993
15	16.5	0.648498
15	20.5	0.615765
15	28.5	0.560329
15	32.5	0.53175
15	36.5	0.511674
15	40.5	0.49063
15	43.6333	0.46993
15	46.3667	0.455964
30	-1.3	1
30	0.5	0.967182
30	4.5	0.722905
30	8.5	0.611596
30	12.5	0.514651
30	16.5	0.45599
30	20.5	0.408588
30	28.5	0.347681
30	32.5	0.323099
30	36.5	0.301257
30	40.5	0.289203
30	43.6333	0.280883
30	46.3667	0.266719
30	-1.3	1
30	0.5	0.964603
30	4.5	0.718154
30	8.5	0.578189
30	12.5	0.500072
30	16.5	0.427753
30	20.5	0.379853
30	28.5	0.318241
30	32.5	0.29939
30	36.5	0.282286
30	40.5	0.264614
30	43.6333	0.246126
30	46.3667	0.233587
30	-1.3	1
30	0.5	0.976666
30	4.5	0.693159
30	8.5	0.560175
30	12.5	0.463305
30	16.5	0.408904
30	20.5	0.366932
30	28.5	0.313582
30	32.5	0.292711
30	36.5	0.272728
30	40.5	0.255796
30	43.6333	0.244711
30	46.3667	0.231008
30	-1.3	1
30	0.5	1.00825
30	4.5	0.729301
30	8.5	0.610346
30	12.5	0.520713
30	16.5	0.462223
30	20.5	0.42333
30	28.5	0.354568
30	32.5	0.326816
30	36.5	0.298762
30	40.5	0.281553
30	43.6333	0.270977
30	46.3667	0.256082
60	-1.3	1
60	0.5	0.97799
60	4.5	0.677764
60	8.5	0.517641
60	12.5	0.405963
60	16.5	0.330972
60	20.5	0.276215
60	28.5	0.217928
60	32.5	0.192953
60	36.5	0.177865
60	40.5	0.168501
60	43.6333	0.164491
60	46.3667	0.158747
60	-1.3	1
60	0.5	0.995949
60	4.5	0.671302
60	8.5	0.541915
60	12.5	0.418689
60	16.5	0.339127
60	20.5	0.27492
60	28.5	0.204588
60	32.5	0.183061
60	36.5	0.167235
60	40.5	0.157097
60	43.6333	0.151751
60	46.3667	0.151052
60	-1.3	1
60	0.5	1.02084
60	4.5	0.676946
60	8.5	0.52706
60	12.5	0.411806
60	16.5	0.337195
60	20.5	0.280032
60	28.5	0.207466
60	32.5	0.18615
60	36.5	0.176452
60	40.5	0.166771
60	43.6333	0.16112
60	46.3667	0.166184
60 + Pyr	-1.3	1
60 + Pyr	0.5	1.01397
60 + Pyr	4.5	0.874372
60 + Pyr	8.5	0.805331
60 + Pyr	12.5	0.752878
60 + Pyr	16.5	0.725005
60 + Pyr	20.5	0.688765
60 + Pyr	28.5	0.651553
60 + Pyr	32.5	0.636827
60 + Pyr	36.5	0.601464
60 + Pyr	40.5	0.592458
60 + Pyr	43.6333	0.578311
60 + Pyr	46.3667	0.579765
60 + Pyr	-1.3	1
60 + Pyr	0.5	0.992632
60 + Pyr	4.5	0.821192
60 + Pyr	8.5	0.747997
60 + Pyr	12.5	0.705243
60 + Pyr	16.5	0.672221
60 + Pyr	20.5	0.623316
60 + Pyr	28.5	0.554646
60 + Pyr	32.5	0.516774
60 + Pyr	36.5	0.494155
60 + Pyr	40.5	0.466985
60 + Pyr	43.6333	0.440143
60 + Pyr	46.3667	0.427567
60 + Pyr	-1.3	1
60 + Pyr	0.5	1.00583
60 + Pyr	4.5	0.842881
60 + Pyr	8.5	0.771156
60 + Pyr	12.5	0.713653
60 + Pyr	16.5	0.668199
60 + Pyr	20.5	0.635389
60 + Pyr	28.5	0.586015
60 + Pyr	32.5	0.526577
60 + Pyr	36.5	0.492435
60 + Pyr	40.5	0.467225
60 + Pyr	43.6333	0.44984
60 + Pyr	46.3667	0.419518

## Sheet: 2C
Asp (mM)	Time since treatment (h)	GFP/Nuc-RFP (AU)
40	-0.533333	1
40	0.5	1.32681
40	3.15	1.00375
40	7.15	0.833141
40	11.15	0.770182
40	15.15	0.809988
40	18.2667	0.891198
40	23.15	0.991078
40	24.5	1.02788
40	27.15	1.07931
40	-0.533333	1
40	0.5	1.14699
40	3.15	1.0209
40	7.15	0.834495
40	11.15	0.746506
40	15.15	0.809765
40	18.2667	0.857758
40	23.15	0.926805
40	24.5	0.957869
40	27.15	0.970723
40	-0.533333	1
40	0.5	1.13013
40	3.15	1.00459
40	7.15	0.826449
40	11.15	0.730362
40	15.15	0.770314
40	18.2667	0.798117
40	23.15	0.846607
40	24.5	0.845001
40	27.15	0.859631
40	-0.533333	1
40	0.5	1.12659
40	3.15	0.967763
40	7.15	0.785123
40	11.15	0.72127
40	15.15	0.773449
40	18.2667	0.819332
40	23.15	0.847429
40	24.5	0.852287
40	27.15	0.857436
35	-0.533333	1
35	0.5	1.25951
35	3.15	0.913994
35	7.15	0.772109
35	11.15	0.694374
35	15.15	0.725475
35	18.2667	0.756661
35	23.15	0.735774
35	24.5	0.723965
35	27.15	0.705468
35	-0.533333	1
35	0.5	1.22633
35	3.15	0.915593
35	7.15	0.733897
35	11.15	0.663347
35	15.15	0.711395
35	18.2667	0.757984
35	23.15	0.748529
35	24.5	0.743309
35	27.15	0.730634
35	-0.533333	1
35	0.5	1.11838
35	3.15	0.953443
35	7.15	0.755586
35	11.15	0.678264
35	15.15	0.724664
35	18.2667	0.759471
35	23.15	0.771486
35	24.5	0.751546
35	27.15	0.745676
35	-0.533333	1
35	0.5	1.09302
35	3.15	0.951268
35	7.15	0.772434
35	11.15	0.679948
35	15.15	0.708085
35	18.2667	0.742477
35	23.15	0.722751
35	24.5	0.72613
35	27.15	0.70798
30	-0.533333	1
30	0.5	1.17746
30	3.15	0.897562
30	7.15	0.703016
30	11.15	0.612458
30	15.15	0.632853
30	18.2667	0.66163
30	23.15	0.629186
30	24.5	0.625259
30	27.15	0.620449
30	-0.533333	1
30	0.5	1.10455
30	3.15	0.872154
30	7.15	0.667152
30	11.15	0.575185
30	15.15	0.598078
30	18.2667	0.647125
30	23.15	0.645041
30	24.5	0.642689
30	27.15	0.629036
30	-0.533333	1
30	0.5	1.09453
30	3.15	0.889381
30	7.15	0.691469
30	11.15	0.604537
30	15.15	0.628238
30	18.2667	0.620914
30	23.15	0.615916
30	24.5	0.610475
30	27.15	0.585378
30	-0.533333	1
30	0.5	1.02584
30	3.15	0.847279
30	7.15	0.652965
30	11.15	0.549229
30	15.15	0.551782
30	18.2667	0.582501
30	23.15	0.56985
30	24.5	0.564988
30	27.15	0.547577
20	-0.533333	1
20	0.5	1.09333
20	3.15	0.798626
20	7.15	0.619146
20	11.15	0.491145
20	15.15	0.47939
20	18.2667	0.493824
20	23.15	0.487707
20	24.5	0.483825
20	27.15	0.480251
20	-0.533333	1
20	0.5	1.0279
20	3.15	0.828834
20	7.15	0.626712
20	11.15	0.481185
20	15.15	0.458403
20	18.2667	0.458541
20	23.15	0.445468
20	24.5	0.432439
20	27.15	0.423432
20	-0.533333	1
20	0.5	1.06842
20	3.15	0.840483
20	7.15	0.638724
20	11.15	0.504661
20	15.15	0.473413
20	18.2667	0.486692
20	23.15	0.482288
20	24.5	0.478764
20	27.15	0.470011
20	-0.533333	1
20	0.5	1.02841
20	3.15	0.808139
20	7.15	0.603539
20	11.15	0.478847
20	15.15	0.456671
20	18.2667	0.464007
20	23.15	0.436639
20	24.5	0.429665
20	27.15	0.423199
10	-0.533333	1
10	0.5	1.04727
10	3.15	0.719166
10	7.15	0.533947
10	11.15	0.386105
10	15.15	0.343543
10	18.2667	0.344277
10	23.15	0.336052
10	24.5	0.334618
10	27.15	0.310138
10	-0.533333	1
10	0.5	0.913729
10	3.15	0.682655
10	7.15	0.518618
10	11.15	0.369277
10	15.15	0.322493
10	18.2667	0.310956
10	23.15	0.291789
10	24.5	0.282465
10	27.15	0.267002
10	-0.533333	1
10	0.5	0.975122
10	3.15	0.695096
10	7.15	0.531272
10	11.15	0.383479
10	15.15	0.337183
10	18.2667	0.346164
10	23.15	0.328699
10	24.5	0.326031
10	27.15	0.310433
10	-0.533333	1
10	0.5	0.972655
10	3.15	0.676715
10	7.15	0.501288
10	11.15	0.364815
10	15.15	0.316025
10	18.2667	0.312875
10	23.15	0.319962
10	24.5	0.314853
10	27.15	0.30383
0	-0.533333	1
0	0.5	0.991167
0	3.15	0.619388
0	7.15	0.513269
0	11.15	0.405024
0	15.15	0.361193
0	18.2667	0.342208
0	23.15	0.310376
0	24.5	0.294639
0	27.15	0.285417
0	-0.533333	1
0	0.5	0.972545
0	3.15	0.603895
0	7.15	0.476884
0	11.15	0.372669
0	15.15	0.318787
0	18.2667	0.315642
0	23.15	0.287548
0	24.5	0.277794
0	27.15	0.264905
0	-0.533333	1
0	0.5	0.951955
0	3.15	0.577634
0	7.15	0.485558
0	11.15	0.385588
0	15.15	0.337031
0	18.2667	0.321254
0	23.15	0.295699
0	24.5	0.288145
0	27.15	0.26652
0	-0.533333	1
0	0.5	0.957264
0	3.15	0.611715
0	7.15	0.485146
0	11.15	0.393005
0	15.15	0.335487
0	18.2667	0.324153
0	23.15	0.299417
0	24.5	0.292379
0	27.15	0.269611

## Sheet: 2E
Gln repl.	Time since Gln depletion (h)	GFP/Nuc-RFP (AU)
0 h	-0.983333	1
0 h	0.166667	1.02702
0 h	0.916667	0.878681
0 h	1.83333	0.822916
0 h	2.75	0.829338
0 h	4.08333	0.81532
0 h	4.91667	0.798678
0 h	5.75	0.768552
0 h	6.75	0.796022
0 h	8.08333	0.743363
0 h	8.75	0.726611
0 h	9.75	0.759092
0 h	10.5833	0.713699
0 h	11.75	0.71557
0 h	13.0833	0.733338
0 h	14.9167	0.70918
0 h	16.75	0.729194
0 h	18.4167	0.737917
0 h	20.0833	0.756535
0 h	21.75	0.746758
0 h	23.0833	0.757501
0 h	25.0833	0.799661
0 h	27.0833	0.796674
0 h	28.75	0.807875
0 h	30.75	0.82329
0 h	32.75	0.850436
0 h	33.75	0.84584
0 h	34.5833	0.857856
0 h	35.75	0.891288
0 h	37.0833	0.864236
0 h	38.9167	0.878581
0 h	40.75	0.890942
0 h	42.4167	0.899973
0 h	44.0833	0.939528
0 h	45.75	0.934023
0 h	-0.983333	1
0 h	0.166667	0.973767
0 h	0.916667	0.916512
0 h	1.83333	0.880182
0 h	2.75	0.872355
0 h	4.08333	0.86186
0 h	4.91667	0.847485
0 h	5.75	0.819293
0 h	6.75	0.819534
0 h	8.08333	0.787108
0 h	8.75	0.774474
0 h	9.75	0.784682
0 h	10.5833	0.764448
0 h	11.75	0.763868
0 h	13.0833	0.780218
0 h	14.9167	0.772007
0 h	16.75	0.780613
0 h	18.4167	0.795971
0 h	20.0833	0.81041
0 h	21.75	0.817478
0 h	23.0833	0.834905
0 h	25.0833	0.868611
0 h	27.0833	0.878277
0 h	28.75	0.874052
0 h	30.75	0.893705
0 h	32.75	0.930439
0 h	33.75	0.926015
0 h	34.5833	0.941412
0 h	35.75	0.950245
0 h	37.0833	0.943298
0 h	38.9167	0.944954
0 h	40.75	0.975576
0 h	42.4167	0.97734
0 h	44.0833	1.01296
0 h	45.75	1.00704
0 h	-0.983333	1
0 h	0.166667	0.973103
0 h	0.916667	0.928704
0 h	1.83333	0.891854
0 h	2.75	0.874428
0 h	4.08333	0.861625
0 h	4.91667	0.852064
0 h	5.75	0.829349
0 h	6.75	0.830247
0 h	8.08333	0.791618
0 h	8.75	0.776431
0 h	9.75	0.792598
0 h	10.5833	0.762151
0 h	11.75	0.76158
0 h	13.0833	0.782384
0 h	14.9167	0.779171
0 h	16.75	0.794372
0 h	18.4167	0.814813
0 h	20.0833	0.828285
0 h	21.75	0.827124
0 h	23.0833	0.83985
0 h	25.0833	0.897789
0 h	27.0833	0.897295
0 h	28.75	0.895398
0 h	30.75	0.908214
0 h	32.75	0.91172
0 h	33.75	0.902886
0 h	34.5833	0.908067
0 h	35.75	0.9229
0 h	37.0833	0.939231
0 h	38.9167	0.953931
0 h	40.75	0.976474
0 h	42.4167	0.976883
0 h	44.0833	1.03255
0 h	45.75	1.01051
0 h	-0.983333	1
0 h	0.166667	0.979565
0 h	0.916667	0.933425
0 h	1.83333	0.898435
0 h	2.75	0.884337
0 h	4.08333	0.864536
0 h	4.91667	0.85611
0 h	5.75	0.835473
0 h	6.75	0.844659
0 h	8.08333	0.803921
0 h	8.75	0.792858
0 h	9.75	0.810952
0 h	10.5833	0.782958
0 h	11.75	0.78555
0 h	13.0833	0.802845
0 h	14.9167	0.802043
0 h	16.75	0.809689
0 h	18.4167	0.826515
0 h	20.0833	0.836643
0 h	21.75	0.849102
0 h	23.0833	0.85287
0 h	25.0833	0.896569
0 h	27.0833	0.897426
0 h	28.75	0.887382
0 h	30.75	0.940729
0 h	32.75	0.943212
0 h	33.75	0.941094
0 h	34.5833	0.965769
0 h	35.75	0.966498
0 h	37.0833	0.964409
0 h	38.9167	0.993372
0 h	40.75	1.02238
0 h	42.4167	1.02971
0 h	44.0833	1.07075
0 h	45.75	1.0748
3 h	-0.983333	1
3 h	0.166667	1.08452
3 h	0.916667	0.971981
3 h	1.83333	0.911473
3 h	2.75	0.904572
3 h	4.08333	0.845622
3 h	4.91667	0.836497
3 h	5.75	0.800062
3 h	6.75	0.802377
3 h	8.08333	0.714719
3 h	8.75	0.684669
3 h	9.75	0.700632
3 h	10.5833	0.667941
3 h	11.75	0.664188
3 h	13.0833	0.689278
3 h	14.9167	0.686903
3 h	16.75	0.72257
3 h	18.4167	0.738803
3 h	20.0833	0.781491
3 h	21.75	0.796583
3 h	23.0833	0.813464
3 h	25.0833	0.869611
3 h	27.0833	0.871473
3 h	28.75	0.881027
3 h	30.75	0.885902
3 h	32.75	0.90441
3 h	33.75	0.898907
3 h	34.5833	0.89589
3 h	35.75	0.899823
3 h	37.0833	0.874789
3 h	38.9167	0.879309
3 h	40.75	0.894076
3 h	42.4167	0.902212
3 h	44.0833	0.945214
3 h	45.75	0.904697
3 h	-0.983333	1
3 h	0.166667	0.972219
3 h	0.916667	0.947968
3 h	1.83333	0.901031
3 h	2.75	0.877841
3 h	4.08333	0.821001
3 h	4.91667	0.814294
3 h	5.75	0.777244
3 h	6.75	0.764595
3 h	8.08333	0.692517
3 h	8.75	0.669537
3 h	9.75	0.666949
3 h	10.5833	0.646338
3 h	11.75	0.646474
3 h	13.0833	0.678795
3 h	14.9167	0.690269
3 h	16.75	0.720621
3 h	18.4167	0.747073
3 h	20.0833	0.790202
3 h	21.75	0.801652
3 h	23.0833	0.813722
3 h	25.0833	0.847862
3 h	27.0833	0.857418
3 h	28.75	0.852084
3 h	30.75	0.863154
3 h	32.75	0.868827
3 h	33.75	0.860829
3 h	34.5833	0.868619
3 h	35.75	0.868123
3 h	37.0833	0.856157
3 h	38.9167	0.884161
3 h	40.75	0.910577
3 h	42.4167	0.913057
3 h	44.0833	0.91614
3 h	45.75	0.900951
3 h	-0.983333	1
3 h	0.166667	1.03539
3 h	0.916667	0.988421
3 h	1.83333	0.957241
3 h	2.75	0.929725
3 h	4.08333	0.874634
3 h	4.91667	0.87395
3 h	5.75	0.838286
3 h	6.75	0.816492
3 h	8.08333	0.736958
3 h	8.75	0.710395
3 h	9.75	0.714973
3 h	10.5833	0.691497
3 h	11.75	0.691119
3 h	13.0833	0.714032
3 h	14.9167	0.728035
3 h	16.75	0.755519
3 h	18.4167	0.784728
3 h	20.0833	0.829539
3 h	21.75	0.853114
3 h	23.0833	0.87122
3 h	25.0833	0.906187
3 h	27.0833	0.93519
3 h	28.75	0.913611
3 h	30.75	0.912961
3 h	32.75	0.92692
3 h	33.75	0.925603
3 h	34.5833	0.92768
3 h	35.75	0.921021
3 h	37.0833	0.914401
3 h	38.9167	0.917079
3 h	40.75	0.920938
3 h	42.4167	0.938742
3 h	44.0833	0.940941
3 h	45.75	0.943247
3 h	-0.983333	1
3 h	0.166667	1.01692
3 h	0.916667	0.990761
3 h	1.83333	0.962468
3 h	2.75	0.93572
3 h	4.08333	0.891229
3 h	4.91667	0.892187
3 h	5.75	0.857388
3 h	6.75	0.834228
3 h	8.08333	0.747236
3 h	8.75	0.727735
3 h	9.75	0.729732
3 h	10.5833	0.711235
3 h	11.75	0.717214
3 h	13.0833	0.737649
3 h	14.9167	0.74212
3 h	16.75	0.786017
3 h	18.4167	0.824924
3 h	20.0833	0.861063
3 h	21.75	0.890965
3 h	23.0833	0.90796
3 h	25.0833	0.957426
3 h	27.0833	0.947844
3 h	28.75	0.945348
3 h	30.75	0.9476
3 h	32.75	0.972015
3 h	33.75	0.970465
3 h	34.5833	0.973661
3 h	35.75	0.994495
3 h	37.0833	0.974079
3 h	38.9167	0.968633
3 h	40.75	0.997773
3 h	42.4167	1.00116
3 h	44.0833	1.06338
3 h	45.75	1.07127
6 h	-0.983333	1
6 h	0.166667	1.04636
6 h	0.916667	0.988633
6 h	1.83333	0.932716
6 h	2.75	0.917397
6 h	4.08333	0.849175
6 h	4.91667	0.685872
6 h	5.75	0.513629
6 h	6.75	0.657056
6 h	8.08333	0.61695
6 h	8.75	0.595998
6 h	9.75	0.585373
6 h	10.5833	0.534841
6 h	11.75	0.52071
6 h	13.0833	0.535
6 h	14.9167	0.548411
6 h	16.75	0.585447
6 h	18.4167	0.619746
6 h	20.0833	0.676078
6 h	21.75	0.714114
6 h	23.0833	0.754685
6 h	25.0833	0.820493
6 h	27.0833	0.858502
6 h	28.75	0.88239
6 h	30.75	0.900613
6 h	32.75	0.914642
6 h	33.75	0.905819
6 h	34.5833	0.916486
6 h	35.75	0.922481
6 h	37.0833	0.907417
6 h	38.9167	0.910233
6 h	40.75	0.924354
6 h	42.4167	0.9188
6 h	44.0833	0.911547
6 h	45.75	0.883056
6 h	-0.983333	1
6 h	0.166667	0.982344
6 h	0.916667	0.976467
6 h	1.83333	0.932403
6 h	2.75	0.917178
6 h	4.08333	0.799059
6 h	4.91667	0.628188
6 h	5.75	0.466826
6 h	6.75	0.666283
6 h	8.08333	0.628215
6 h	8.75	0.606339
6 h	9.75	0.584787
6 h	10.5833	0.544637
6 h	11.75	0.532068
6 h	13.0833	0.551737
6 h	14.9167	0.570332
6 h	16.75	0.611132
6 h	18.4167	0.656386
6 h	20.0833	0.71461
6 h	21.75	0.7594
6 h	23.0833	0.802236
6 h	25.0833	0.862786
6 h	27.0833	0.897369
6 h	28.75	0.925584
6 h	30.75	0.956969
6 h	32.75	0.950141
6 h	33.75	0.938378
6 h	34.5833	0.952429
6 h	35.75	0.956826
6 h	37.0833	0.932479
6 h	38.9167	0.944587
6 h	40.75	0.947551
6 h	42.4167	0.937743
6 h	44.0833	0.94123
6 h	45.75	0.922738
6 h	-0.983333	1
6 h	0.166667	1.03841
6 h	0.916667	1.01524
6 h	1.83333	0.973817
6 h	2.75	0.940134
6 h	4.08333	0.858411
6 h	4.91667	0.682836
6 h	5.75	0.512258
6 h	6.75	0.698478
6 h	8.08333	0.661689
6 h	8.75	0.635066
6 h	9.75	0.61228
6 h	10.5833	0.568571
6 h	11.75	0.554118
6 h	13.0833	0.572106
6 h	14.9167	0.587715
6 h	16.75	0.63197
6 h	18.4167	0.679288
6 h	20.0833	0.736759
6 h	21.75	0.781236
6 h	23.0833	0.825962
6 h	25.0833	0.89819
6 h	27.0833	0.924327
6 h	28.75	0.953742
6 h	30.75	0.977923
6 h	32.75	0.987219
6 h	33.75	0.983244
6 h	34.5833	0.989352
6 h	35.75	0.983546
6 h	37.0833	0.971556
6 h	38.9167	0.966897
6 h	40.75	0.970028
6 h	42.4167	0.956703
6 h	44.0833	0.962481
6 h	45.75	0.926594
6 h	-0.983333	1
6 h	0.166667	1.00926
6 h	0.916667	1.00033
6 h	1.83333	0.954472
6 h	2.75	0.921822
6 h	4.08333	0.837874
6 h	4.91667	0.663531
6 h	5.75	0.491217
6 h	6.75	0.689037
6 h	8.08333	0.648868
6 h	8.75	0.620206
6 h	9.75	0.608801
6 h	10.5833	0.566286
6 h	11.75	0.546574
6 h	13.0833	0.566092
6 h	14.9167	0.58131
6 h	16.75	0.630199
6 h	18.4167	0.673894
6 h	20.0833	0.732653
6 h	21.75	0.7781
6 h	23.0833	0.822101
6 h	25.0833	0.896682
6 h	27.0833	0.936714
6 h	28.75	0.961044
6 h	30.75	0.983413
6 h	32.75	1.01285
6 h	33.75	1.00323
6 h	34.5833	0.999795
6 h	35.75	1.00864
6 h	37.0833	0.994631
6 h	38.9167	0.992736
6 h	40.75	1.00261
6 h	42.4167	0.987926
6 h	44.0833	0.998309
6 h	45.75	0.964007
9 h	-0.983333	1
9 h	0.166667	1.02645
9 h	0.916667	1.01078
9 h	1.83333	0.933523
9 h	2.75	0.924815
9 h	4.08333	0.84863
9 h	4.91667	0.686151
9 h	5.75	0.510995
9 h	6.75	0.451074
9 h	8.08333	0.265151
9 h	8.75	0.208522
9 h	9.75	0.375212
9 h	10.5833	0.36517
9 h	11.75	0.378008
9 h	13.0833	0.394389
9 h	14.9167	0.39278
9 h	16.75	0.434806
9 h	18.4167	0.477472
9 h	20.0833	0.534498
9 h	21.75	0.581022
9 h	23.0833	0.630988
9 h	25.0833	0.719357
9 h	27.0833	0.794132
9 h	28.75	0.838981
9 h	30.75	0.885158
9 h	32.75	0.926348
9 h	33.75	0.934568
9 h	34.5833	0.948568
9 h	35.75	0.951334
9 h	37.0833	0.949763
9 h	38.9167	0.94798
9 h	40.75	0.94633
9 h	42.4167	0.931495
9 h	44.0833	0.926209
9 h	45.75	0.906112
9 h	-0.983333	1
9 h	0.166667	1.03643
9 h	0.916667	1.01518
9 h	1.83333	0.959309
9 h	2.75	0.947803
9 h	4.08333	0.873202
9 h	4.91667	0.719522
9 h	5.75	0.539835
9 h	6.75	0.468925
9 h	8.08333	0.269763
9 h	8.75	0.209742
9 h	9.75	0.388669
9 h	10.5833	0.380983
9 h	11.75	0.388082
9 h	13.0833	0.403462
9 h	14.9167	0.400668
9 h	16.75	0.443058
9 h	18.4167	0.488955
9 h	20.0833	0.547507
9 h	21.75	0.592652
9 h	23.0833	0.645378
9 h	25.0833	0.743516
9 h	27.0833	0.823748
9 h	28.75	0.877996
9 h	30.75	0.929449
9 h	32.75	0.969142
9 h	33.75	0.96439
9 h	34.5833	0.990333
9 h	35.75	1.00492
9 h	37.0833	1.00441
9 h	38.9167	0.996587
9 h	40.75	0.989128
9 h	42.4167	0.974194
9 h	44.0833	0.977206
9 h	45.75	0.93342
9 h	-0.983333	1
9 h	0.166667	0.951144
9 h	0.916667	1.00737
9 h	1.83333	0.937468
9 h	2.75	0.927637
9 h	4.08333	0.843839
9 h	4.91667	0.689072
9 h	5.75	0.508168
9 h	6.75	0.451761
9 h	8.08333	0.261382
9 h	8.75	0.203371
9 h	9.75	0.371583
9 h	10.5833	0.363056
9 h	11.75	0.371188
9 h	13.0833	0.393089
9 h	14.9167	0.394387
9 h	16.75	0.434802
9 h	18.4167	0.473107
9 h	20.0833	0.533377
9 h	21.75	0.580037
9 h	23.0833	0.633604
9 h	25.0833	0.733613
9 h	27.0833	0.806472
9 h	28.75	0.853514
9 h	30.75	0.903726
9 h	32.75	0.943113
9 h	33.75	0.945685
9 h	34.5833	0.961842
9 h	35.75	0.986907
9 h	37.0833	0.974757
9 h	38.9167	0.961846
9 h	40.75	0.964251
9 h	42.4167	0.964854
9 h	44.0833	0.97154
9 h	45.75	0.937698
9 h	-0.983333	1
9 h	0.166667	1.01192
9 h	0.916667	1.00346
9 h	1.83333	0.960597
9 h	2.75	0.943745
9 h	4.08333	0.841927
9 h	4.91667	0.673259
9 h	5.75	0.506399
9 h	6.75	0.43976
9 h	8.08333	0.257934
9 h	8.75	0.204005
9 h	9.75	0.387221
9 h	10.5833	0.378443
9 h	11.75	0.388165
9 h	13.0833	0.397609
9 h	14.9167	0.404206
9 h	16.75	0.446277
9 h	18.4167	0.490597
9 h	20.0833	0.545401
9 h	21.75	0.594364
9 h	23.0833	0.650015
9 h	25.0833	0.743421
9 h	27.0833	0.830252
9 h	28.75	0.877964
9 h	30.75	0.934523
9 h	32.75	0.963658
9 h	33.75	0.972672
9 h	34.5833	0.976267
9 h	35.75	0.99266
9 h	37.0833	0.997328
9 h	38.9167	0.999257
9 h	40.75	0.990362
9 h	42.4167	0.974327
9 h	44.0833	0.971061
9 h	45.75	0.95766
12 h	-0.983333	1
12 h	0.166667	0.961314
12 h	0.916667	0.982681
12 h	1.83333	0.923383
12 h	2.75	0.9069
12 h	4.08333	0.824778
12 h	4.91667	0.663115
12 h	5.75	0.489147
12 h	6.75	0.428687
12 h	8.08333	0.249922
12 h	8.75	0.198702
12 h	9.75	0.175054
12 h	10.5833	0.127518
12 h	11.75	0.0934881
12 h	13.0833	0.221816
12 h	14.9167	0.262728
12 h	16.75	0.302861
12 h	18.4167	0.338902
12 h	20.0833	0.387498
12 h	21.75	0.43262
12 h	23.0833	0.478544
12 h	25.0833	0.558614
12 h	27.0833	0.636653
12 h	28.75	0.705309
12 h	30.75	0.793829
12 h	32.75	0.863563
12 h	33.75	0.888236
12 h	34.5833	0.923861
12 h	35.75	0.941106
12 h	37.0833	0.963181
12 h	38.9167	0.996048
12 h	40.75	1.02726
12 h	42.4167	1.02434
12 h	44.0833	1.01635
12 h	45.75	0.973532
12 h	-0.983333	1
12 h	0.166667	0.956885
12 h	0.916667	1.00591
12 h	1.83333	0.935195
12 h	2.75	0.920752
12 h	4.08333	0.826065
12 h	4.91667	0.67276
12 h	5.75	0.506435
12 h	6.75	0.450625
12 h	8.08333	0.264884
12 h	8.75	0.208177
12 h	9.75	0.180423
12 h	10.5833	0.131954
12 h	11.75	0.0968692
12 h	13.0833	0.22073
12 h	14.9167	0.255073
12 h	16.75	0.294889
12 h	18.4167	0.326787
12 h	20.0833	0.371642
12 h	21.75	0.413638
12 h	23.0833	0.457883
12 h	25.0833	0.534298
12 h	27.0833	0.61024
12 h	28.75	0.678692
12 h	30.75	0.761924
12 h	32.75	0.836981
12 h	33.75	0.856506
12 h	34.5833	0.883949
12 h	35.75	0.915436
12 h	37.0833	0.929757
12 h	38.9167	0.96741
12 h	40.75	0.990073
12 h	42.4167	0.984939
12 h	44.0833	1.00699
12 h	45.75	0.977323
12 h	-0.983333	1
12 h	0.166667	0.913535
12 h	0.916667	0.985468
12 h	1.83333	0.926122
12 h	2.75	0.902605
12 h	4.08333	0.825416
12 h	4.91667	0.677569
12 h	5.75	0.510656
12 h	6.75	0.455622
12 h	8.08333	0.266948
12 h	8.75	0.20977
12 h	9.75	0.186809
12 h	10.5833	0.13449
12 h	11.75	0.0968619
12 h	13.0833	0.224914
12 h	14.9167	0.261462
12 h	16.75	0.296654
12 h	18.4167	0.330722
12 h	20.0833	0.378544
12 h	21.75	0.418258
12 h	23.0833	0.458128
12 h	25.0833	0.536078
12 h	27.0833	0.613631
12 h	28.75	0.680929
12 h	30.75	0.763164
12 h	32.75	0.842866
12 h	33.75	0.863988
12 h	34.5833	0.887107
12 h	35.75	0.919621
12 h	37.0833	0.935773
12 h	38.9167	0.959089
12 h	40.75	0.994181
12 h	42.4167	0.999176
12 h	44.0833	0.98533
12 h	45.75	0.964565
12 h	-0.983333	1
12 h	0.166667	0.998536
12 h	0.916667	1.00693
12 h	1.83333	0.959942
12 h	2.75	0.932053
12 h	4.08333	0.834634
12 h	4.91667	0.672775
12 h	5.75	0.501596
12 h	6.75	0.441412
12 h	8.08333	0.262918
12 h	8.75	0.208113
12 h	9.75	0.180739
12 h	10.5833	0.131803
12 h	11.75	0.0954118
12 h	13.0833	0.22183
12 h	14.9167	0.267394
12 h	16.75	0.303819
12 h	18.4167	0.33788
12 h	20.0833	0.382752
12 h	21.75	0.429728
12 h	23.0833	0.473669
12 h	25.0833	0.557725
12 h	27.0833	0.647098
12 h	28.75	0.721749
12 h	30.75	0.80643
12 h	32.75	0.881576
12 h	33.75	0.907869
12 h	34.5833	0.928804
12 h	35.75	0.966996
12 h	37.0833	0.984312
12 h	38.9167	1.02361
12 h	40.75	1.04083
12 h	42.4167	1.03935
12 h	44.0833	1.03674
12 h	45.75	1.00668
Never	-0.983333	1
Never	0.166667	0.998259
Never	0.916667	0.991086
Never	1.83333	0.946286
Never	2.75	0.948861
Never	4.08333	0.850579
Never	4.91667	0.694177
Never	5.75	0.518913
Never	6.75	0.458849
Never	8.08333	0.275234
Never	8.75	0.217696
Never	9.75	0.194597
Never	10.5833	0.14135
Never	11.75	0.104625
Never	13.0833	0.0886171
Never	14.9167	0.0587814
Never	16.75	0.0471126
Never	18.4167	0.0401639
Never	20.0833	0.0368594
Never	21.75	0.0330427
Never	23.0833	0.0328774
Never	25.0833	0.0319121
Never	27.0833	0.0327602
Never	28.75	0.0333352
Never	30.75	0.0340314
Never	32.75	0.0355025
Never	33.75	0.0353348
Never	34.5833	0.0364504
Never	35.75	0.0371113
Never	37.0833	0.0376886
Never	38.9167	0.0389849
Never	40.75	0.0409025
Never	42.4167	0.0425133
Never	44.0833	0.0445406
Never	45.75	0.0455446
Never	-0.983333	1
Never	0.166667	0.980045
Never	0.916667	0.993721
Never	1.83333	0.952485
Never	2.75	0.948226
Never	4.08333	0.866431
Never	4.91667	0.707984
Never	5.75	0.531188
Never	6.75	0.46602
Never	8.08333	0.280477
Never	8.75	0.221732
Never	9.75	0.195884
Never	10.5833	0.144339
Never	11.75	0.107228
Never	13.0833	0.0924769
Never	14.9167	0.0614237
Never	16.75	0.0489706
Never	18.4167	0.0414998
Never	20.0833	0.0377323
Never	21.75	0.0338531
Never	23.0833	0.0331263
Never	25.0833	0.0324629
Never	27.0833	0.0335529
Never	28.75	0.0334583
Never	30.75	0.0342387
Never	32.75	0.0356159
Never	33.75	0.0354765
Never	34.5833	0.0366853
Never	35.75	0.0379548
Never	37.0833	0.0385834
Never	38.9167	0.0402294
Never	40.75	0.0424017
Never	42.4167	0.0438618
Never	44.0833	0.0459656
Never	45.75	0.04727
Never	-0.983333	1
Never	0.166667	0.960964
Never	0.916667	1.00047
Never	1.83333	0.963109
Never	2.75	0.940996
Never	4.08333	0.842158
Never	4.91667	0.692225
Never	5.75	0.511108
Never	6.75	0.454631
Never	8.08333	0.273706
Never	8.75	0.216545
Never	9.75	0.19136
Never	10.5833	0.141759
Never	11.75	0.104498
Never	13.0833	0.088691
Never	14.9167	0.0593045
Never	16.75	0.0474667
Never	18.4167	0.0412764
Never	20.0833	0.0379967
Never	21.75	0.0337225
Never	23.0833	0.0329421
Never	25.0833	0.0337036
Never	27.0833	0.0347091
Never	28.75	0.0347549
Never	30.75	0.0351931
Never	32.75	0.0367322
Never	33.75	0.0365387
Never	34.5833	0.0377022
Never	35.75	0.038468
Never	37.0833	0.0388942
Never	38.9167	0.0406474
Never	40.75	0.0425426
Never	42.4167	0.0440715
Never	44.0833	0.0458953
Never	45.75	0.0471859
Never	-0.983333	1
Never	0.166667	0.963641
Never	0.916667	1.00762
Never	1.83333	0.96386
Never	2.75	0.932668
Never	4.08333	0.839691
Never	4.91667	0.688287
Never	5.75	0.520182
Never	6.75	0.462657
Never	8.08333	0.281061
Never	8.75	0.222381
Never	9.75	0.194357
Never	10.5833	0.143213
Never	11.75	0.106704
Never	13.0833	0.0914855
Never	14.9167	0.06222
Never	16.75	0.0493761
Never	18.4167	0.042645
Never	20.0833	0.039168
Never	21.75	0.0350923
Never	23.0833	0.0346807
Never	25.0833	0.0343756
Never	27.0833	0.035929
Never	28.75	0.0355239
Never	30.75	0.0360221
Never	32.75	0.0374066
Never	33.75	0.0376207
Never	34.5833	0.0389414
Never	35.75	0.0398007
Never	37.0833	0.0400887
Never	38.9167	0.0417505
Never	40.75	0.0435513
Never	42.4167	0.0449134
Never	44.0833	0.0470862
Never	45.75	0.047749

## Sheet: 2F
Rotenone (nM)/Metformin (mM)	Time since treatment (h)	GFP/Nuc-RFP (AU)
0, Rotenone	-0.566667	1
0, Rotenone	0.5	1.01247
0, Rotenone	2.5	0.959368
0, Rotenone	3.5	0.919006
0, Rotenone	4.5	0.929521
0, Rotenone	6.5	0.8985
0, Rotenone	8.5	0.887793
0, Rotenone	10.5	0.908716
0, Rotenone	12.5	0.923548
0, Rotenone	14.5	0.931533
0, Rotenone	16.5	0.980476
0, Rotenone	18.5	1.00112
0, Rotenone	20.5	1.01946
0, Rotenone	22.5	1.02844
0, Rotenone	25.5	1.10653
0, Rotenone	26.5	1.10226
0, Rotenone	27.5	1.10327
0, Rotenone	28.5	1.09429
0, Rotenone	30.5	1.11527
0, Rotenone	32.5	1.12355
0, Rotenone	34.5	1.14006
0, Rotenone	36.5	1.17181
0, Rotenone	38.5	1.18289
0, Rotenone	-0.566667	1
0, Rotenone	0.5	0.985261
0, Rotenone	2.5	0.947423
0, Rotenone	3.5	0.926091
0, Rotenone	4.5	0.919333
0, Rotenone	6.5	0.928327
0, Rotenone	8.5	0.933615
0, Rotenone	10.5	0.950097
0, Rotenone	12.5	0.956184
0, Rotenone	14.5	0.984624
0, Rotenone	16.5	1.02031
0, Rotenone	18.5	1.07001
0, Rotenone	20.5	1.08629
0, Rotenone	22.5	1.09485
0, Rotenone	25.5	1.1373
0, Rotenone	26.5	1.16365
0, Rotenone	27.5	1.15993
0, Rotenone	28.5	1.17715
0, Rotenone	30.5	1.18732
0, Rotenone	32.5	1.20856
0, Rotenone	34.5	1.21552
0, Rotenone	36.5	1.23141
0, Rotenone	38.5	1.21747
0, Rotenone	-0.566667	1
0, Rotenone	0.5	0.975994
0, Rotenone	2.5	0.931363
0, Rotenone	3.5	0.932125
0, Rotenone	4.5	0.90078
0, Rotenone	6.5	0.903
0, Rotenone	8.5	0.884655
0, Rotenone	10.5	0.891102
0, Rotenone	12.5	0.922464
0, Rotenone	14.5	0.92829
0, Rotenone	16.5	0.972215
0, Rotenone	18.5	1.00434
0, Rotenone	20.5	1.02544
0, Rotenone	22.5	1.05312
0, Rotenone	25.5	1.09056
0, Rotenone	26.5	1.11183
0, Rotenone	27.5	1.10123
0, Rotenone	28.5	1.11091
0, Rotenone	30.5	1.1177
0, Rotenone	32.5	1.12279
0, Rotenone	34.5	1.13588
0, Rotenone	36.5	1.17375
0, Rotenone	38.5	1.20667
30, Rotenone	-0.566667	1
30, Rotenone	0.5	0.895849
30, Rotenone	2.5	0.688307
30, Rotenone	3.5	0.638491
30, Rotenone	4.5	0.574572
30, Rotenone	6.5	0.508662
30, Rotenone	8.5	0.451632
30, Rotenone	10.5	0.414503
30, Rotenone	12.5	0.384371
30, Rotenone	14.5	0.367595
30, Rotenone	16.5	0.356554
30, Rotenone	18.5	0.344415
30, Rotenone	20.5	0.341619
30, Rotenone	22.5	0.337992
30, Rotenone	25.5	0.353941
30, Rotenone	26.5	0.341411
30, Rotenone	27.5	0.336493
30, Rotenone	28.5	0.342467
30, Rotenone	30.5	0.337111
30, Rotenone	32.5	0.346674
30, Rotenone	34.5	0.347485
30, Rotenone	36.5	0.36148
30, Rotenone	38.5	0.371548
30, Rotenone	-0.566667	1
30, Rotenone	0.5	0.932978
30, Rotenone	2.5	0.647339
30, Rotenone	3.5	0.596302
30, Rotenone	4.5	0.537986
30, Rotenone	6.5	0.478271
30, Rotenone	8.5	0.408553
30, Rotenone	10.5	0.361541
30, Rotenone	12.5	0.330311
30, Rotenone	14.5	0.30348
30, Rotenone	16.5	0.294797
30, Rotenone	18.5	0.287874
30, Rotenone	20.5	0.287886
30, Rotenone	22.5	0.283944
30, Rotenone	25.5	0.300387
30, Rotenone	26.5	0.284828
30, Rotenone	27.5	0.287063
30, Rotenone	28.5	0.284706
30, Rotenone	30.5	0.2874
30, Rotenone	32.5	0.289005
30, Rotenone	34.5	0.285229
30, Rotenone	36.5	0.287195
30, Rotenone	38.5	0.292711
30, Rotenone	-0.566667	1
30, Rotenone	0.5	0.889318
30, Rotenone	2.5	0.672097
30, Rotenone	3.5	0.59027
30, Rotenone	4.5	0.544667
30, Rotenone	6.5	0.488581
30, Rotenone	8.5	0.436787
30, Rotenone	10.5	0.395304
30, Rotenone	12.5	0.371003
30, Rotenone	14.5	0.341131
30, Rotenone	16.5	0.328403
30, Rotenone	18.5	0.321973
30, Rotenone	20.5	0.307774
30, Rotenone	22.5	0.314848
30, Rotenone	25.5	0.316173
30, Rotenone	26.5	0.30755
30, Rotenone	27.5	0.303083
30, Rotenone	28.5	0.302258
30, Rotenone	30.5	0.304491
30, Rotenone	32.5	0.305894
30, Rotenone	34.5	0.316227
30, Rotenone	36.5	0.315175
30, Rotenone	38.5	0.329298
30, Rotenone	-0.566667	1
30, Rotenone	0.5	0.899697
30, Rotenone	2.5	0.676772
30, Rotenone	3.5	0.593394
30, Rotenone	4.5	0.54699
30, Rotenone	6.5	0.481543
30, Rotenone	8.5	0.439799
30, Rotenone	10.5	0.396374
30, Rotenone	12.5	0.363384
30, Rotenone	14.5	0.361572
30, Rotenone	16.5	0.348274
30, Rotenone	18.5	0.350694
30, Rotenone	20.5	0.338116
30, Rotenone	22.5	0.343393
30, Rotenone	25.5	0.34904
30, Rotenone	26.5	0.349338
30, Rotenone	27.5	0.348612
30, Rotenone	28.5	0.357048
30, Rotenone	30.5	0.363534
30, Rotenone	32.5	0.374086
30, Rotenone	34.5	0.395724
30, Rotenone	36.5	0.397901
30, Rotenone	38.5	0.401216
60, Rotenone	-0.566667	1
60, Rotenone	0.5	0.912379
60, Rotenone	2.5	0.598266
60, Rotenone	3.5	0.533475
60, Rotenone	4.5	0.482187
60, Rotenone	6.5	0.396828
60, Rotenone	8.5	0.337173
60, Rotenone	10.5	0.300392
60, Rotenone	12.5	0.261614
60, Rotenone	14.5	0.228008
60, Rotenone	16.5	0.222005
60, Rotenone	18.5	0.214822
60, Rotenone	20.5	0.207785
60, Rotenone	22.5	0.198496
60, Rotenone	25.5	0.206079
60, Rotenone	26.5	0.199507
60, Rotenone	27.5	0.196001
60, Rotenone	28.5	0.19296
60, Rotenone	30.5	0.198157
60, Rotenone	32.5	0.19524
60, Rotenone	34.5	0.197998
60, Rotenone	36.5	0.199967
60, Rotenone	38.5	0.200815
60, Rotenone	-0.566667	1
60, Rotenone	0.5	0.911706
60, Rotenone	2.5	0.626808
60, Rotenone	3.5	0.555473
60, Rotenone	4.5	0.507263
60, Rotenone	6.5	0.435141
60, Rotenone	8.5	0.363181
60, Rotenone	10.5	0.311059
60, Rotenone	12.5	0.277908
60, Rotenone	14.5	0.254141
60, Rotenone	16.5	0.241475
60, Rotenone	18.5	0.228076
60, Rotenone	20.5	0.213673
60, Rotenone	22.5	0.205593
60, Rotenone	25.5	0.200213
60, Rotenone	26.5	0.188985
60, Rotenone	27.5	0.189878
60, Rotenone	28.5	0.190992
60, Rotenone	30.5	0.189968
60, Rotenone	32.5	0.182413
60, Rotenone	34.5	0.181484
60, Rotenone	36.5	0.178778
60, Rotenone	38.5	0.184637
60, Rotenone	-0.566667	1
60, Rotenone	0.5	0.943007
60, Rotenone	2.5	0.641508
60, Rotenone	3.5	0.556749
60, Rotenone	4.5	0.487195
60, Rotenone	6.5	0.415677
60, Rotenone	8.5	0.343493
60, Rotenone	10.5	0.299772
60, Rotenone	12.5	0.266666
60, Rotenone	14.5	0.259585
60, Rotenone	16.5	0.225523
60, Rotenone	18.5	0.219158
60, Rotenone	20.5	0.205396
60, Rotenone	22.5	0.190822
60, Rotenone	25.5	0.203318
60, Rotenone	26.5	0.190507
60, Rotenone	27.5	0.181438
60, Rotenone	28.5	0.180348
60, Rotenone	30.5	0.177423
60, Rotenone	32.5	0.173376
60, Rotenone	34.5	0.17298
60, Rotenone	36.5	0.176148
60, Rotenone	38.5	0.175714
60, Rotenone	-0.566667	1
60, Rotenone	0.5	0.82779
60, Rotenone	2.5	0.627218
60, Rotenone	3.5	0.561753
60, Rotenone	4.5	0.504549
60, Rotenone	6.5	0.436229
60, Rotenone	8.5	0.379629
60, Rotenone	10.5	0.351018
60, Rotenone	12.5	0.318859
60, Rotenone	14.5	0.28756
60, Rotenone	16.5	0.271746
60, Rotenone	18.5	0.2664
60, Rotenone	20.5	0.256033
60, Rotenone	22.5	0.251391
60, Rotenone	25.5	0.254014
60, Rotenone	26.5	0.250145
60, Rotenone	27.5	0.250382
60, Rotenone	28.5	0.246328
60, Rotenone	30.5	0.241395
60, Rotenone	32.5	0.246737
60, Rotenone	34.5	0.25944
60, Rotenone	36.5	0.270918
60, Rotenone	38.5	0.285858
0, Metformin	-0.566667	1
0, Metformin	0.5	1.08936
0, Metformin	2.5	1.00234
0, Metformin	3.5	0.959222
0, Metformin	4.5	0.93971
0, Metformin	6.5	0.930533
0, Metformin	8.5	0.933442
0, Metformin	10.5	0.93574
0, Metformin	12.5	0.951821
0, Metformin	14.5	0.978464
0, Metformin	16.5	1.00353
0, Metformin	18.5	1.03209
0, Metformin	20.5	1.06178
0, Metformin	22.5	1.08314
0, Metformin	25.5	1.14628
0, Metformin	26.5	1.11521
0, Metformin	27.5	1.1343
0, Metformin	28.5	1.12563
0, Metformin	30.5	1.12813
0, Metformin	32.5	1.14091
0, Metformin	34.5	1.15521
0, Metformin	36.5	1.16848
0, Metformin	38.5	1.15598
0, Metformin	-0.566667	1
0, Metformin	0.5	1.05414
0, Metformin	2.5	0.938726
0, Metformin	3.5	0.916554
0, Metformin	4.5	0.916686
0, Metformin	6.5	0.901196
0, Metformin	8.5	0.883403
0, Metformin	10.5	0.87713
0, Metformin	12.5	0.906837
0, Metformin	14.5	0.911405
0, Metformin	16.5	0.954304
0, Metformin	18.5	0.962989
0, Metformin	20.5	0.991249
0, Metformin	22.5	1.00415
0, Metformin	25.5	1.09927
0, Metformin	26.5	1.10338
0, Metformin	27.5	1.08876
0, Metformin	28.5	1.0868
0, Metformin	30.5	1.11623
0, Metformin	32.5	1.14178
0, Metformin	34.5	1.15958
0, Metformin	36.5	1.16755
0, Metformin	38.5	1.17154
0, Metformin	-0.566667	1
0, Metformin	0.5	0.964129
0, Metformin	2.5	0.90537
0, Metformin	3.5	0.898737
0, Metformin	4.5	0.888471
0, Metformin	6.5	0.882556
0, Metformin	8.5	0.891977
0, Metformin	10.5	0.860718
0, Metformin	12.5	0.879886
0, Metformin	14.5	0.900093
0, Metformin	16.5	0.941346
0, Metformin	18.5	0.963742
0, Metformin	20.5	1.00697
0, Metformin	22.5	1.03157
0, Metformin	25.5	1.13644
0, Metformin	26.5	1.1324
0, Metformin	27.5	1.12517
0, Metformin	28.5	1.12652
0, Metformin	30.5	1.13321
0, Metformin	32.5	1.1509
0, Metformin	34.5	1.15555
0, Metformin	36.5	1.185
0, Metformin	38.5	1.16939
2, Metformin	-0.566667	1
2, Metformin	0.5	1.02789
2, Metformin	2.5	0.936887
2, Metformin	3.5	0.889879
2, Metformin	4.5	0.855041
2, Metformin	6.5	0.804982
2, Metformin	8.5	0.735122
2, Metformin	10.5	0.688518
2, Metformin	12.5	0.641349
2, Metformin	14.5	0.604065
2, Metformin	16.5	0.585486
2, Metformin	18.5	0.567191
2, Metformin	20.5	0.555902
2, Metformin	22.5	0.547527
2, Metformin	25.5	0.517075
2, Metformin	26.5	0.514272
2, Metformin	27.5	0.498536
2, Metformin	28.5	0.484223
2, Metformin	30.5	0.46888
2, Metformin	32.5	0.442128
2, Metformin	34.5	0.420853
2, Metformin	36.5	0.422742
2, Metformin	38.5	0.419274
2, Metformin	-0.566667	1
2, Metformin	0.5	0.934011
2, Metformin	2.5	0.90338
2, Metformin	3.5	0.866706
2, Metformin	4.5	0.847318
2, Metformin	6.5	0.764594
2, Metformin	8.5	0.699725
2, Metformin	10.5	0.644359
2, Metformin	12.5	0.610004
2, Metformin	14.5	0.577866
2, Metformin	16.5	0.551641
2, Metformin	18.5	0.535546
2, Metformin	20.5	0.506589
2, Metformin	22.5	0.475092
2, Metformin	25.5	0.482047
2, Metformin	26.5	0.462584
2, Metformin	27.5	0.442602
2, Metformin	28.5	0.43181
2, Metformin	30.5	0.416241
2, Metformin	32.5	0.403269
2, Metformin	34.5	0.384032
2, Metformin	36.5	0.377003
2, Metformin	38.5	0.371708
2, Metformin	-0.566667	1
2, Metformin	0.5	1.03287
2, Metformin	2.5	0.967491
2, Metformin	3.5	0.930895
2, Metformin	4.5	0.892857
2, Metformin	6.5	0.840368
2, Metformin	8.5	0.787949
2, Metformin	10.5	0.729083
2, Metformin	12.5	0.684603
2, Metformin	14.5	0.643135
2, Metformin	16.5	0.613805
2, Metformin	18.5	0.5964
2, Metformin	20.5	0.575297
2, Metformin	22.5	0.548601
2, Metformin	25.5	0.538458
2, Metformin	26.5	0.526483
2, Metformin	27.5	0.509194
2, Metformin	28.5	0.510156
2, Metformin	30.5	0.502423
2, Metformin	32.5	0.489341
2, Metformin	34.5	0.477453
2, Metformin	36.5	0.464677
2, Metformin	38.5	0.461632
4, Metformin	-0.566667	1
4, Metformin	0.5	0.956009
4, Metformin	2.5	0.88839
4, Metformin	3.5	0.827426
4, Metformin	4.5	0.785361
4, Metformin	6.5	0.680577
4, Metformin	8.5	0.590307
4, Metformin	10.5	0.507281
4, Metformin	12.5	0.439842
4, Metformin	14.5	0.38566
4, Metformin	16.5	0.345035
4, Metformin	18.5	0.322045
4, Metformin	20.5	0.299935
4, Metformin	22.5	0.287319
4, Metformin	25.5	0.270716
4, Metformin	26.5	0.265794
4, Metformin	27.5	0.25951
4, Metformin	28.5	0.258724
4, Metformin	30.5	0.25502
4, Metformin	32.5	0.254215
4, Metformin	34.5	0.256822
4, Metformin	36.5	0.251008
4, Metformin	38.5	0.258749
4, Metformin	-0.566667	1
4, Metformin	0.5	0.934007
4, Metformin	2.5	0.857517
4, Metformin	3.5	0.796407
4, Metformin	4.5	0.745509
4, Metformin	6.5	0.64638
4, Metformin	8.5	0.560414
4, Metformin	10.5	0.493534
4, Metformin	12.5	0.426297
4, Metformin	14.5	0.376908
4, Metformin	16.5	0.336929
4, Metformin	18.5	0.31584
4, Metformin	20.5	0.29547
4, Metformin	22.5	0.277058
4, Metformin	25.5	0.266729
4, Metformin	26.5	0.260106
4, Metformin	27.5	0.248821
4, Metformin	28.5	0.246828
4, Metformin	30.5	0.244742
4, Metformin	32.5	0.240205
4, Metformin	34.5	0.250084
4, Metformin	36.5	0.25247
4, Metformin	38.5	0.253231
4, Metformin	-0.566667	1
4, Metformin	0.5	0.994461
4, Metformin	2.5	0.921301
4, Metformin	3.5	0.853418
4, Metformin	4.5	0.791839
4, Metformin	6.5	0.693401
4, Metformin	8.5	0.605112
4, Metformin	10.5	0.531449
4, Metformin	12.5	0.470694
4, Metformin	14.5	0.426637
4, Metformin	16.5	0.372519
4, Metformin	18.5	0.349561
4, Metformin	20.5	0.330756
4, Metformin	22.5	0.311031
4, Metformin	25.5	0.318187
4, Metformin	26.5	0.304122
4, Metformin	27.5	0.302928
4, Metformin	28.5	0.297348
4, Metformin	30.5	0.273497
4, Metformin	32.5	0.275695
4, Metformin	34.5	0.279718
4, Metformin	36.5	0.28352
4, Metformin	38.5	0.27747
4, Metformin	-0.566667	1
4, Metformin	0.5	0.984339
4, Metformin	2.5	0.906032
4, Metformin	3.5	0.842846
4, Metformin	4.5	0.764076
4, Metformin	6.5	0.647021
4, Metformin	8.5	0.560141
4, Metformin	10.5	0.494892
4, Metformin	12.5	0.425051
4, Metformin	14.5	0.381743
4, Metformin	16.5	0.345633
4, Metformin	18.5	0.318284
4, Metformin	20.5	0.293046
4, Metformin	22.5	0.284389
4, Metformin	25.5	0.277214
4, Metformin	26.5	0.269015
4, Metformin	27.5	0.260752
4, Metformin	28.5	0.262484
4, Metformin	30.5	0.269672
4, Metformin	32.5	0.263033
4, Metformin	34.5	0.271345
4, Metformin	36.5	0.270232
4, Metformin	38.5	0.283926

## Sheet: 2G
BAM15 rescue	Time since Oligomycin (h)	GFP/Nuc-RFP (AU)
0 nM	-1.16667	1
0 nM	1	0.883886
0 nM	5	0.7576
0 nM	9	0.619752
0 nM	13	0.534269
0 nM	17	0.493866
0 nM	21	0.482779
0 nM	25	0.497058
0 nM	29	0.492423
0 nM	33	0.504581
0 nM	37	0.510843
0 nM	-1.16667	1
0 nM	1	0.864072
0 nM	5	0.719014
0 nM	9	0.593177
0 nM	13	0.530422
0 nM	17	0.48314
0 nM	21	0.478822
0 nM	25	0.498889
0 nM	29	0.483291
0 nM	33	0.475187
0 nM	37	0.48032
0 nM	-1.16667	1
0 nM	1	0.857912
0 nM	5	0.732455
0 nM	9	0.615704
0 nM	13	0.548777
0 nM	17	0.504698
0 nM	21	0.480854
0 nM	25	0.487936
0 nM	29	0.473218
0 nM	33	0.487293
0 nM	37	0.496791
0 nM	-1.16667	1
0 nM	1	0.893463
0 nM	5	0.752323
0 nM	9	0.648271
0 nM	13	0.582353
0 nM	17	0.557527
0 nM	21	0.535424
0 nM	25	0.541823
0 nM	29	0.54044
0 nM	33	0.539576
0 nM	37	0.54805
150 nM	-1.16667	1
150 nM	1	0.8789
150 nM	5	0.730698
150 nM	9	0.600751
150 nM	13	0.533856
150 nM	17	0.506431
150 nM	21	0.500394
150 nM	25	0.586326
150 nM	29	0.589176
150 nM	33	0.603146
150 nM	37	0.612771
150 nM	-1.16667	1
150 nM	1	0.86317
150 nM	5	0.719906
150 nM	9	0.602347
150 nM	13	0.532078
150 nM	17	0.495239
150 nM	21	0.48016
150 nM	25	0.584967
150 nM	29	0.604232
150 nM	33	0.603272
150 nM	37	0.609469
150 nM	-1.16667	1
150 nM	1	0.857309
150 nM	5	0.713216
150 nM	9	0.589345
150 nM	13	0.514857
150 nM	17	0.480774
150 nM	21	0.464232
150 nM	25	0.556383
150 nM	29	0.575576
150 nM	33	0.586011
150 nM	37	0.590409
150 nM	-1.16667	1
150 nM	1	0.887008
150 nM	5	0.768863
150 nM	9	0.647827
150 nM	13	0.560844
150 nM	17	0.544169
150 nM	21	0.516125
150 nM	25	0.613478
150 nM	29	0.635785
150 nM	33	0.657572
150 nM	37	0.645995
300 nM	-1.16667	1
300 nM	1	0.873474
300 nM	5	0.720038
300 nM	9	0.608619
300 nM	13	0.541387
300 nM	17	0.502465
300 nM	21	0.482181
300 nM	25	0.636893
300 nM	29	0.686112
300 nM	33	0.716993
300 nM	37	0.733081
300 nM	-1.16667	1
300 nM	1	0.881128
300 nM	5	0.726927
300 nM	9	0.596577
300 nM	13	0.528019
300 nM	17	0.489786
300 nM	21	0.461066
300 nM	25	0.613939
300 nM	29	0.650043
300 nM	33	0.655731
300 nM	37	0.669679
300 nM	-1.16667	1
300 nM	1	0.861594
300 nM	5	0.712248
300 nM	9	0.585788
300 nM	13	0.510546
300 nM	17	0.486168
300 nM	21	0.465377
300 nM	25	0.605781
300 nM	29	0.642498
300 nM	33	0.65949
300 nM	37	0.676466
300 nM	-1.16667	1
300 nM	1	0.905707
300 nM	5	0.772961
300 nM	9	0.655134
300 nM	13	0.585718
300 nM	17	0.553639
300 nM	21	0.528918
300 nM	25	0.676062
300 nM	29	0.725368
300 nM	33	0.758955
300 nM	37	0.796544
600 nM	-1.16667	1
600 nM	1	0.910415
600 nM	5	0.765241
600 nM	9	0.651728
600 nM	13	0.580878
600 nM	17	0.55098
600 nM	21	0.550168
600 nM	25	0.776608
600 nM	29	0.846649
600 nM	33	0.87483
600 nM	37	0.918056
600 nM	-1.16667	1
600 nM	1	0.874083
600 nM	5	0.748449
600 nM	9	0.623051
600 nM	13	0.546555
600 nM	17	0.515677
600 nM	21	0.492572
600 nM	25	0.704777
600 nM	29	0.762927
600 nM	33	0.786736
600 nM	37	0.832491
600 nM	-1.16667	1
600 nM	1	0.876408
600 nM	5	0.718288
600 nM	9	0.594672
600 nM	13	0.533777
600 nM	17	0.507868
600 nM	21	0.486662
600 nM	25	0.705041
600 nM	29	0.762476
600 nM	33	0.79613
600 nM	37	0.818595
600 nM	-1.16667	1
600 nM	1	0.888787
600 nM	5	0.747754
600 nM	9	0.63973
600 nM	13	0.57198
600 nM	17	0.556441
600 nM	21	0.54569
600 nM	25	0.786644
600 nM	29	0.852141
600 nM	33	0.871221
600 nM	37	0.921884

## Sheet: 2H
Gln (mM)	Time since treatment (h)	GFP/Nuc-RFP (AU)
2	-1.9	1
2	0.5	1.06426
2	2.5	0.970609
2	4.5	0.964483
2	6.5	0.918447
2	8.5	0.865396
2	10.5	0.836047
2	12.5	0.831729
2	14.5	0.837408
2	16.5	0.845351
2	18.5	0.854009
2	20.5	0.861615
2	22.5	0.875369
2	26.5	0.894097
2	28.5	0.891998
2	30.5	0.878381
2	32.5	0.862742
2	34.5	0.853208
2	36.5	0.855863
2	38.5	0.83646
2	40.5	0.841671
2	44.5	0.827068
2	46.5	0.804004
2	50.5	0.823952
2	52.5	0.826319
2	54.5	0.847798
2	56.5	0.861993
2	58.5	0.918337
2	60.5	0.933469
2	62.5	1.00849
2	64.5	1.0121
2	68.5	1.04576
2	-1.9	1
2	0.5	0.996488
2	2.5	0.962071
2	4.5	0.952792
2	6.5	0.912037
2	8.5	0.875942
2	10.5	0.849363
2	12.5	0.840422
2	14.5	0.852622
2	16.5	0.859431
2	18.5	0.861297
2	20.5	0.875017
2	22.5	0.867518
2	26.5	0.895251
2	28.5	0.887914
2	30.5	0.863279
2	32.5	0.877743
2	34.5	0.884042
2	36.5	0.87891
2	38.5	0.855722
2	40.5	0.835204
2	44.5	0.814336
2	46.5	0.786569
2	50.5	0.758972
2	52.5	0.746701
2	54.5	0.751439
2	56.5	0.73349
2	58.5	0.741993
2	60.5	0.753493
2	62.5	0.747385
2	64.5	0.760051
2	68.5	0.741809
2 + Asn	-1.9	1
2 + Asn	0.5	1.02599
2 + Asn	2.5	0.974565
2 + Asn	4.5	0.964897
2 + Asn	6.5	0.924335
2 + Asn	8.5	0.896299
2 + Asn	10.5	0.887345
2 + Asn	12.5	0.887552
2 + Asn	14.5	0.903163
2 + Asn	16.5	0.928393
2 + Asn	18.5	0.951849
2 + Asn	20.5	0.948223
2 + Asn	22.5	0.961111
2 + Asn	26.5	0.970023
2 + Asn	28.5	0.947843
2 + Asn	30.5	0.943826
2 + Asn	32.5	0.945727
2 + Asn	34.5	0.937614
2 + Asn	36.5	0.921254
2 + Asn	38.5	0.911824
2 + Asn	40.5	0.907758
2 + Asn	44.5	0.887817
2 + Asn	46.5	0.866984
2 + Asn	50.5	0.83517
2 + Asn	52.5	0.808234
2 + Asn	54.5	0.812788
2 + Asn	56.5	0.822704
2 + Asn	58.5	0.835853
2 + Asn	60.5	0.832697
2 + Asn	62.5	0.85769
2 + Asn	64.5	0.853706
2 + Asn	68.5	0.809421
2 + Asn	-1.9	1
2 + Asn	0.5	1.0101
2 + Asn	2.5	0.961658
2 + Asn	4.5	0.957379
2 + Asn	6.5	0.9322
2 + Asn	8.5	0.90082
2 + Asn	10.5	0.884219
2 + Asn	12.5	0.898954
2 + Asn	14.5	0.922192
2 + Asn	16.5	0.923444
2 + Asn	18.5	0.934365
2 + Asn	20.5	0.938589
2 + Asn	22.5	0.95119
2 + Asn	26.5	1.0088
2 + Asn	28.5	1.00122
2 + Asn	30.5	0.990608
2 + Asn	32.5	0.981909
2 + Asn	34.5	1.01112
2 + Asn	36.5	0.993958
2 + Asn	38.5	0.983207
2 + Asn	40.5	0.993451
2 + Asn	44.5	0.984987
2 + Asn	46.5	0.960212
2 + Asn	50.5	0.934841
2 + Asn	52.5	0.922223
2 + Asn	54.5	0.924943
2 + Asn	56.5	0.933755
2 + Asn	58.5	0.940393
2 + Asn	60.5	0.950562
2 + Asn	62.5	0.97507
2 + Asn	64.5	0.990277
2 + Asn	68.5	0.898321
1	-1.9	1
1	0.5	1.03421
1	2.5	0.965848
1	4.5	0.964126
1	6.5	0.915892
1	8.5	0.858981
1	10.5	0.819978
1	12.5	0.825575
1	14.5	0.818072
1	16.5	0.813935
1	18.5	0.819782
1	20.5	0.81395
1	22.5	0.822753
1	26.5	0.812046
1	28.5	0.804069
1	30.5	0.794342
1	32.5	0.791364
1	34.5	0.785418
1	36.5	0.766883
1	38.5	0.750482
1	40.5	0.726694
1	44.5	0.670298
1	46.5	0.599999
1	50.5	0.381721
1	52.5	0.241575
1	54.5	0.158451
1	56.5	0.109862
1	58.5	0.0815963
1	60.5	0.0608322
1	62.5	0.0475374
1	64.5	0.0389288
1	68.5	0.0294048
1	-1.9	1
1	0.5	1.01571
1	2.5	0.947506
1	4.5	0.923889
1	6.5	0.872863
1	8.5	0.818411
1	10.5	0.773628
1	12.5	0.750198
1	14.5	0.749944
1	16.5	0.750403
1	18.5	0.747132
1	20.5	0.748745
1	22.5	0.750066
1	26.5	0.789977
1	28.5	0.783549
1	30.5	0.778019
1	32.5	0.776236
1	34.5	0.75449
1	36.5	0.724184
1	38.5	0.712788
1	40.5	0.679047
1	44.5	0.596065
1	46.5	0.538415
1	50.5	0.367845
1	52.5	0.250701
1	54.5	0.156625
1	56.5	0.09771
1	58.5	0.0637903
1	60.5	0.0439401
1	62.5	0.0316462
1	64.5	0.0241044
1	68.5	0.0173022
1 + Asn	-1.9	1
1 + Asn	0.5	1.01519
1 + Asn	2.5	0.956908
1 + Asn	4.5	0.949616
1 + Asn	6.5	0.908342
1 + Asn	8.5	0.868576
1 + Asn	10.5	0.842525
1 + Asn	12.5	0.849889
1 + Asn	14.5	0.866731
1 + Asn	16.5	0.873762
1 + Asn	18.5	0.877426
1 + Asn	20.5	0.869443
1 + Asn	22.5	0.876851
1 + Asn	26.5	0.88908
1 + Asn	28.5	0.892615
1 + Asn	30.5	0.894825
1 + Asn	32.5	0.891897
1 + Asn	34.5	0.890094
1 + Asn	36.5	0.862895
1 + Asn	38.5	0.839349
1 + Asn	40.5	0.796852
1 + Asn	44.5	0.725808
1 + Asn	46.5	0.664643
1 + Asn	50.5	0.561066
1 + Asn	52.5	0.479057
1 + Asn	54.5	0.401926
1 + Asn	56.5	0.303636
1 + Asn	58.5	0.215463
1 + Asn	60.5	0.141636
1 + Asn	62.5	0.0958005
1 + Asn	64.5	0.0668512
1 + Asn	68.5	0.0385609
1 + Asn	-1.9	1
1 + Asn	0.5	0.96688
1 + Asn	2.5	0.899121
1 + Asn	4.5	0.894373
1 + Asn	6.5	0.85624
1 + Asn	8.5	0.80798
1 + Asn	10.5	0.786181
1 + Asn	12.5	0.785169
1 + Asn	14.5	0.790677
1 + Asn	16.5	0.796265
1 + Asn	18.5	0.810537
1 + Asn	20.5	0.807943
1 + Asn	22.5	0.817857
1 + Asn	26.5	0.835509
1 + Asn	28.5	0.821856
1 + Asn	30.5	0.810969
1 + Asn	32.5	0.811167
1 + Asn	34.5	0.796895
1 + Asn	36.5	0.780923
1 + Asn	38.5	0.769884
1 + Asn	40.5	0.73393
1 + Asn	44.5	0.658752
1 + Asn	46.5	0.596689
1 + Asn	50.5	0.496441
1 + Asn	52.5	0.418145
1 + Asn	54.5	0.325016
1 + Asn	56.5	0.228446
1 + Asn	58.5	0.153568
1 + Asn	60.5	0.104176
1 + Asn	62.5	0.0760205
1 + Asn	64.5	0.0576484
1 + Asn	68.5	0.0388045
0.5	-1.9	1
0.5	0.5	1.04209
0.5	2.5	0.953608
0.5	4.5	0.94494
0.5	6.5	0.899419
0.5	8.5	0.835423
0.5	10.5	0.788517
0.5	12.5	0.764307
0.5	14.5	0.767206
0.5	16.5	0.760898
0.5	18.5	0.752303
0.5	20.5	0.740923
0.5	22.5	0.74084
0.5	26.5	0.741209
0.5	28.5	0.69481
0.5	30.5	0.611307
0.5	32.5	0.47394
0.5	34.5	0.325048
0.5	36.5	0.197892
0.5	38.5	0.11944
0.5	40.5	0.0728538
0.5	44.5	0.0368214
0.5	46.5	0.0275337
0.5	50.5	0.01815
0.5	52.5	0.0158854
0.5	54.5	0.0149956
0.5	56.5	0.0143959
0.5	58.5	0.0136941
0.5	60.5	0.0131505
0.5	62.5	0.0130869
0.5	64.5	0.013203
0.5	68.5	0.0132791
0.5	-1.9	1
0.5	0.5	1.09451
0.5	2.5	0.957151
0.5	4.5	0.941349
0.5	6.5	0.894984
0.5	8.5	0.828197
0.5	10.5	0.766698
0.5	12.5	0.737623
0.5	14.5	0.726254
0.5	16.5	0.714815
0.5	18.5	0.708849
0.5	20.5	0.695627
0.5	22.5	0.6847
0.5	26.5	0.67179
0.5	28.5	0.632486
0.5	30.5	0.578274
0.5	32.5	0.477694
0.5	34.5	0.363272
0.5	36.5	0.238441
0.5	38.5	0.149291
0.5	40.5	0.0857232
0.5	44.5	0.0334037
0.5	46.5	0.0228685
0.5	50.5	0.0155106
0.5	52.5	0.0134442
0.5	54.5	0.0122153
0.5	56.5	0.0115733
0.5	58.5	0.0109829
0.5	60.5	0.0108531
0.5	62.5	0.0103529
0.5	64.5	0.0103286
0.5	68.5	0.0104799
0.5 + Asn	-1.9	1
0.5 + Asn	0.5	1.08381
0.5 + Asn	2.5	0.962562
0.5 + Asn	4.5	0.942751
0.5 + Asn	6.5	0.899114
0.5 + Asn	8.5	0.843371
0.5 + Asn	10.5	0.807644
0.5 + Asn	12.5	0.775721
0.5 + Asn	14.5	0.773756
0.5 + Asn	16.5	0.773695
0.5 + Asn	18.5	0.762369
0.5 + Asn	20.5	0.752385
0.5 + Asn	22.5	0.731069
0.5 + Asn	26.5	0.706489
0.5 + Asn	28.5	0.656299
0.5 + Asn	30.5	0.599406
0.5 + Asn	32.5	0.532852
0.5 + Asn	34.5	0.445105
0.5 + Asn	36.5	0.33966
0.5 + Asn	38.5	0.24801
0.5 + Asn	40.5	0.164905
0.5 + Asn	44.5	0.0707257
0.5 + Asn	46.5	0.0465829
0.5 + Asn	50.5	0.0261349
0.5 + Asn	52.5	0.0215476
0.5 + Asn	54.5	0.0194403
0.5 + Asn	56.5	0.0172673
0.5 + Asn	58.5	0.0157718
0.5 + Asn	60.5	0.0149123
0.5 + Asn	62.5	0.0145389
0.5 + Asn	64.5	0.0144581
0.5 + Asn	68.5	0.0157587
0.5 + Asn	-1.9	1
0.5 + Asn	0.5	1.01055
0.5 + Asn	2.5	0.942851
0.5 + Asn	4.5	0.922417
0.5 + Asn	6.5	0.863676
0.5 + Asn	8.5	0.815907
0.5 + Asn	10.5	0.780057
0.5 + Asn	12.5	0.76326
0.5 + Asn	14.5	0.760405
0.5 + Asn	16.5	0.747035
0.5 + Asn	18.5	0.740077
0.5 + Asn	20.5	0.729893
0.5 + Asn	22.5	0.722504
0.5 + Asn	26.5	0.705139
0.5 + Asn	28.5	0.668299
0.5 + Asn	30.5	0.612481
0.5 + Asn	32.5	0.543176
0.5 + Asn	34.5	0.454769
0.5 + Asn	36.5	0.3517
0.5 + Asn	38.5	0.262191
0.5 + Asn	40.5	0.174069
0.5 + Asn	44.5	0.0746334
0.5 + Asn	46.5	0.0465948
0.5 + Asn	50.5	0.0228152
0.5 + Asn	52.5	0.018838
0.5 + Asn	54.5	0.0156898
0.5 + Asn	56.5	0.0142928
0.5 + Asn	58.5	0.0132783
0.5 + Asn	60.5	0.0123229
0.5 + Asn	62.5	0.0120327
0.5 + Asn	64.5	0.0115659
0.5 + Asn	68.5	0.0133174
0.25	-1.9	1
0.25	0.5	1.0592
0.25	2.5	0.972041
0.25	4.5	0.956789
0.25	6.5	0.896026
0.25	8.5	0.811533
0.25	10.5	0.74118
0.25	12.5	0.69029
0.25	14.5	0.640546
0.25	16.5	0.582617
0.25	18.5	0.506177
0.25	20.5	0.409572
0.25	22.5	0.313642
0.25	26.5	0.155347
0.25	28.5	0.107052
0.25	30.5	0.0740321
0.25	32.5	0.0527278
0.25	34.5	0.0387436
0.25	36.5	0.0306177
0.25	38.5	0.0269575
0.25	40.5	0.0241285
0.25	44.5	0.0245387
0.25	46.5	0.0234973
0.25	50.5	0.024
0.25	52.5	0.0245627
0.25	54.5	0.0249544
0.25	56.5	0.0250787
0.25	58.5	0.025685
0.25	60.5	0.0265569
0.25	62.5	0.027289
0.25	64.5	0.0278879
0.25	68.5	0.0305008
0.25	-1.9	1
0.25	0.5	1.0623
0.25	2.5	0.95952
0.25	4.5	0.940933
0.25	6.5	0.883748
0.25	8.5	0.802958
0.25	10.5	0.728223
0.25	12.5	0.672751
0.25	14.5	0.618863
0.25	16.5	0.554307
0.25	18.5	0.475002
0.25	20.5	0.379231
0.25	22.5	0.288113
0.25	26.5	0.14988
0.25	28.5	0.100015
0.25	30.5	0.07019
0.25	32.5	0.0492141
0.25	34.5	0.0390712
0.25	36.5	0.0281201
0.25	38.5	0.024016
0.25	40.5	0.0219792
0.25	44.5	0.0203819
0.25	46.5	0.0199069
0.25	50.5	0.0195037
0.25	52.5	0.0197197
0.25	54.5	0.0206635
0.25	56.5	0.0204041
0.25	58.5	0.0217052
0.25	60.5	0.0217629
0.25	62.5	0.0224063
0.25	64.5	0.023309
0.25	68.5	0.0252223
0.25 + Asn	-1.9	1
0.25 + Asn	0.5	1.05082
0.25 + Asn	2.5	0.946464
0.25 + Asn	4.5	0.91386
0.25 + Asn	6.5	0.852017
0.25 + Asn	8.5	0.779032
0.25 + Asn	10.5	0.707025
0.25 + Asn	12.5	0.656946
0.25 + Asn	14.5	0.606099
0.25 + Asn	16.5	0.543472
0.25 + Asn	18.5	0.475355
0.25 + Asn	20.5	0.40077
0.25 + Asn	22.5	0.316937
0.25 + Asn	26.5	0.188075
0.25 + Asn	28.5	0.139229
0.25 + Asn	30.5	0.104686
0.25 + Asn	32.5	0.0749704
0.25 + Asn	34.5	0.0568407
0.25 + Asn	36.5	0.0443367
0.25 + Asn	38.5	0.0373854
0.25 + Asn	40.5	0.0314799
0.25 + Asn	44.5	0.0274727
0.25 + Asn	46.5	0.0253619
0.25 + Asn	50.5	0.0239203
0.25 + Asn	52.5	0.0235727
0.25 + Asn	54.5	0.0238154
0.25 + Asn	56.5	0.0239321
0.25 + Asn	58.5	0.0245101
0.25 + Asn	60.5	0.0246607
0.25 + Asn	62.5	0.0253775
0.25 + Asn	64.5	0.026414
0.25 + Asn	68.5	0.027545
0.25 + Asn	-1.9	1
0.25 + Asn	0.5	1.0027
0.25 + Asn	2.5	0.936046
0.25 + Asn	4.5	0.913585
0.25 + Asn	6.5	0.859193
0.25 + Asn	8.5	0.798512
0.25 + Asn	10.5	0.741523
0.25 + Asn	12.5	0.692481
0.25 + Asn	14.5	0.632699
0.25 + Asn	16.5	0.562866
0.25 + Asn	18.5	0.489038
0.25 + Asn	20.5	0.403617
0.25 + Asn	22.5	0.320092
0.25 + Asn	26.5	0.194276
0.25 + Asn	28.5	0.141239
0.25 + Asn	30.5	0.108163
0.25 + Asn	32.5	0.0790199
0.25 + Asn	34.5	0.0605165
0.25 + Asn	36.5	0.0463681
0.25 + Asn	38.5	0.0372359
0.25 + Asn	40.5	0.0318895
0.25 + Asn	44.5	0.0273119
0.25 + Asn	46.5	0.0249414
0.25 + Asn	50.5	0.0248016
0.25 + Asn	52.5	0.0241141
0.25 + Asn	54.5	0.0240873
0.25 + Asn	56.5	0.0242074
0.25 + Asn	58.5	0.024093
0.25 + Asn	60.5	0.0242544
0.25 + Asn	62.5	0.0237209
0.25 + Asn	64.5	0.0245183
0.25 + Asn	68.5	0.0283099
0.125	-1.9	1
0.125	0.5	1.04188
0.125	2.5	0.945172
0.125	4.5	0.921646
0.125	6.5	0.848453
0.125	8.5	0.730364
0.125	10.5	0.590953
0.125	12.5	0.457079
0.125	14.5	0.330766
0.125	16.5	0.23898
0.125	18.5	0.172507
0.125	20.5	0.122902
0.125	22.5	0.0914245
0.125	26.5	0.0524765
0.125	28.5	0.0397287
0.125	30.5	0.0328302
0.125	32.5	0.0279879
0.125	34.5	0.0257609
0.125	36.5	0.0238662
0.125	38.5	0.0251588
0.125	40.5	0.0256135
0.125	44.5	0.0244061
0.125	46.5	0.0245999
0.125	50.5	0.0258455
0.125	52.5	0.0263922
0.125	54.5	0.0268913
0.125	56.5	0.0274134
0.125	58.5	0.028249
0.125	60.5	0.0288673
0.125	62.5	0.0299803
0.125	64.5	0.0324777
0.125	68.5	0.0344767
0.125	-1.9	1
0.125	0.5	1.07256
0.125	2.5	0.938533
0.125	4.5	0.899216
0.125	6.5	0.817019
0.125	8.5	0.694453
0.125	10.5	0.562393
0.125	12.5	0.42036
0.125	14.5	0.300568
0.125	16.5	0.212199
0.125	18.5	0.147031
0.125	20.5	0.101794
0.125	22.5	0.0723199
0.125	26.5	0.0412061
0.125	28.5	0.0315808
0.125	30.5	0.0269958
0.125	32.5	0.0240046
0.125	34.5	0.0222856
0.125	36.5	0.0207934
0.125	38.5	0.0214971
0.125	40.5	0.0209093
0.125	44.5	0.0229663
0.125	46.5	0.0223002
0.125	50.5	0.0218421
0.125	52.5	0.0219042
0.125	54.5	0.0217694
0.125	56.5	0.0222314
0.125	58.5	0.023254
0.125	60.5	0.0240168
0.125	62.5	0.0252639
0.125	64.5	0.0258345
0.125	68.5	0.0274633
0.125 + Asn	-1.9	1
0.125 + Asn	0.5	1.05992
0.125 + Asn	2.5	0.941801
0.125 + Asn	4.5	0.901784
0.125 + Asn	6.5	0.826819
0.125 + Asn	8.5	0.70172
0.125 + Asn	10.5	0.570923
0.125 + Asn	12.5	0.452809
0.125 + Asn	14.5	0.350671
0.125 + Asn	16.5	0.266678
0.125 + Asn	18.5	0.201276
0.125 + Asn	20.5	0.149805
0.125 + Asn	22.5	0.117017
0.125 + Asn	26.5	0.077589
0.125 + Asn	28.5	0.0616744
0.125 + Asn	30.5	0.05113
0.125 + Asn	32.5	0.0426876
0.125 + Asn	34.5	0.0366354
0.125 + Asn	36.5	0.0324783
0.125 + Asn	38.5	0.0300273
0.125 + Asn	40.5	0.0290487
0.125 + Asn	44.5	0.0291644
0.125 + Asn	46.5	0.0287291
0.125 + Asn	50.5	0.0277461
0.125 + Asn	52.5	0.0277686
0.125 + Asn	54.5	0.0277194
0.125 + Asn	56.5	0.0285532
0.125 + Asn	58.5	0.0289762
0.125 + Asn	60.5	0.0294589
0.125 + Asn	62.5	0.031135
0.125 + Asn	64.5	0.031639
0.125 + Asn	68.5	0.0338892
0.125 + Asn	-1.9	1
0.125 + Asn	0.5	1.01175
0.125 + Asn	2.5	0.928999
0.125 + Asn	4.5	0.877256
0.125 + Asn	6.5	0.782074
0.125 + Asn	8.5	0.67322
0.125 + Asn	10.5	0.538309
0.125 + Asn	12.5	0.422211
0.125 + Asn	14.5	0.320916
0.125 + Asn	16.5	0.235973
0.125 + Asn	18.5	0.173308
0.125 + Asn	20.5	0.131399
0.125 + Asn	22.5	0.098382
0.125 + Asn	26.5	0.0601354
0.125 + Asn	28.5	0.0470307
0.125 + Asn	30.5	0.0392962
0.125 + Asn	32.5	0.0329619
0.125 + Asn	34.5	0.0296605
0.125 + Asn	36.5	0.0268944
0.125 + Asn	38.5	0.0257323
0.125 + Asn	40.5	0.0242115
0.125 + Asn	44.5	0.024269
0.125 + Asn	46.5	0.0238671
0.125 + Asn	50.5	0.0244847
0.125 + Asn	52.5	0.025153
0.125 + Asn	54.5	0.0250803
0.125 + Asn	56.5	0.0258711
0.125 + Asn	58.5	0.0270785
0.125 + Asn	60.5	0.0273878
0.125 + Asn	62.5	0.0283581
0.125 + Asn	64.5	0.029639
0.125 + Asn	68.5	0.0361451
0	-1.9	1
0	0.5	1.08424
0	2.5	0.919006
0	4.5	0.532414
0	6.5	0.286717
0	8.5	0.156776
0	10.5	0.0854645
0	12.5	0.0529517
0	14.5	0.0363764
0	16.5	0.0286267
0	18.5	0.0238617
0	20.5	0.0211414
0	22.5	0.0193935
0	26.5	0.0191001
0	28.5	0.0177485
0	30.5	0.0177603
0	32.5	0.0179
0	34.5	0.0183387
0	36.5	0.0180155
0	38.5	0.0184537
0	40.5	0.0191907
0	44.5	0.0221196
0	46.5	0.0228962
0	50.5	0.025023
0	52.5	0.0263692
0	54.5	0.0280886
0	56.5	0.028946
0	58.5	0.031017
0	60.5	0.0323392
0	62.5	0.0338655
0	64.5	0.0353906
0	68.5	0.0384197
0	-1.9	1
0	0.5	1.05443
0	2.5	0.885836
0	4.5	0.516559
0	6.5	0.271507
0	8.5	0.142406
0	10.5	0.0791023
0	12.5	0.0484649
0	14.5	0.0331488
0	16.5	0.0257742
0	18.5	0.0220282
0	20.5	0.0201084
0	22.5	0.0188951
0	26.5	0.0182401
0	28.5	0.0176615
0	30.5	0.0177883
0	32.5	0.0176213
0	34.5	0.0180026
0	36.5	0.0182489
0	38.5	0.0181235
0	40.5	0.0188245
0	44.5	0.0205473
0	46.5	0.0217889
0	50.5	0.0236719
0	52.5	0.0245918
0	54.5	0.0261416
0	56.5	0.0274601
0	58.5	0.0285798
0	60.5	0.0302108
0	62.5	0.0314233
0	64.5	0.0332155
0	68.5	0.0370615
0 + Asn	-1.9	1
0 + Asn	0.5	1.0454
0 + Asn	2.5	0.873013
0 + Asn	4.5	0.50076
0 + Asn	6.5	0.294024
0 + Asn	8.5	0.169199
0 + Asn	10.5	0.100336
0 + Asn	12.5	0.0638458
0 + Asn	14.5	0.0450521
0 + Asn	16.5	0.0344056
0 + Asn	18.5	0.0292688
0 + Asn	20.5	0.0268392
0 + Asn	22.5	0.024676
0 + Asn	26.5	0.0243818
0 + Asn	28.5	0.0228009
0 + Asn	30.5	0.0235841
0 + Asn	32.5	0.023884
0 + Asn	34.5	0.024563
0 + Asn	36.5	0.0252459
0 + Asn	38.5	0.0256231
0 + Asn	40.5	0.0266215
0 + Asn	44.5	0.0296584
0 + Asn	46.5	0.0307015
0 + Asn	50.5	0.0344445
0 + Asn	52.5	0.0363282
0 + Asn	54.5	0.0395428
0 + Asn	56.5	0.0422767
0 + Asn	58.5	0.0452122
0 + Asn	60.5	0.0481116
0 + Asn	62.5	0.0510981
0 + Asn	64.5	0.054213
0 + Asn	68.5	0.0649285
0 + Asn	-1.9	1
0 + Asn	0.5	1.04991
0 + Asn	2.5	0.894089
0 + Asn	4.5	0.52464
0 + Asn	6.5	0.308144
0 + Asn	8.5	0.172554
0 + Asn	10.5	0.099791
0 + Asn	12.5	0.0640502
0 + Asn	14.5	0.0450519
0 + Asn	16.5	0.0340697
0 + Asn	18.5	0.0287168
0 + Asn	20.5	0.025108
0 + Asn	22.5	0.0233537
0 + Asn	26.5	0.0235934
0 + Asn	28.5	0.023149
0 + Asn	30.5	0.0227179
0 + Asn	32.5	0.0218559
0 + Asn	34.5	0.0219922
0 + Asn	36.5	0.022205
0 + Asn	38.5	0.022739
0 + Asn	40.5	0.0234821
0 + Asn	44.5	0.0255882
0 + Asn	46.5	0.0264109
0 + Asn	50.5	0.02923
0 + Asn	52.5	0.0311696
0 + Asn	54.5	0.0323374
0 + Asn	56.5	0.0346205
0 + Asn	58.5	0.0363843
0 + Asn	60.5	0.0384389
0 + Asn	62.5	0.0403075
0 + Asn	64.5	0.042346
0 + Asn	68.5	0.0479559
