# Supplementary material for: An engineered biosensor enables dynamic aspartate measurements in living cells
Source: eLife. 2024 Feb 23;12:RP90024. doi: 10.7554/eLife.90024 (PMC10942590; doi:10.7554/eLife.90024)
Supplement: Figure 3—source data 1. [file elife-90024-fig3-data1.xlsx]

## Sheet: 3A
Drug	Drug conc. (nM)	Intracellular Asp (µM)	GFP/Nuc-RFP (AU)
Rotenone	0	5666.16	6.18295
Rotenone	3.75	4279.45	5.32039
Rotenone	7.5	2963.46	5.35878
Rotenone	15	2031.7	4.29335
Rotenone	30	1168.5	2.99351
Rotenone	60	723.885	2.50157
Rotenone	0	5616.11	6.16521
Rotenone	3.75	4253.94	5.37035
Rotenone	7.5	2851.26	4.94638
Rotenone	15	2137.86	3.9858
Rotenone	30	1037.57	3.28471
Rotenone	60	643.945	2.36459
Rotenone	0	5844.87	6.02394
Rotenone	3.75	3785.1	5.41774
Rotenone	7.5	2766.47	4.91703
Rotenone	15	1980.57	4.04906
Rotenone	30	985.149	3.10648
Rotenone	60	627.139	2.37408
Antimycin A	5000	110.039	0.751261
Rotenone	60 + Pyr	3869.56	5.00039
Antimycin A	5000	104.423	0.720152
Rotenone	60 + Pyr	4313.27	4.63246
Antimycin A	5000	119.108	0.699383
Rotenone	60 + Pyr	3395.94	4.57178
Metformin	0	6176.21	7.08881
Metformin	250000	5394.12	7.28137
Metformin	500000	4105.42	6.75643
Metformin	1000000	2984.69	5.8787
Metformin	2000000	1679.59	4.29149
Metformin	0	6175.83	7.28576
Metformin	250000	5182.79	6.66509
Metformin	500000	4060.2	6.66762
Metformin	1000000	3761.55	5.67715
Metformin	2000000	1372.35	4.2491
Metformin	0	6057.94	6.99182
Metformin	250000	4889.73	7.08081
Metformin	500000	4062.62	6.62566
Metformin	1000000	3155.7	5.42746
Metformin	2000000	1343.15	4.33717

## Sheet: 3B
Rotenone (nM)	Intracellular Asp (µM)	GFP/RFP (AU)
0	2965.81	9.94771
12.5	1621.85	6.84366
25	1172.17	5.59108
50	951.058	3.60731
100	691.759	2.96745
100 + Pyr	1168.8	4.5415
0	2737.84	8.40646
12.5	1417.98	6.05109
25	1047.63	4.70193
50	834.299	3.53625
100	715.325	2.87996
100 + Pyr	1131	4.05614
0	2520.65	8.5022
12.5	1448	6.37107
25	1111.41	4.95667
50	1001.82	3.39867
100	565.921	2.75937
100 + Pyr	1310.61	4.25635

## Sheet: 3C
Drug	Drug conc. (nM)	Intracellular Asp (µM)	GFP/Nuc-RFP (AU)
Rotenone	0	1786.21	28.3356
Rotenone	12.5	594.96	14.0887
Rotenone	50	224.985	7.5965
Rotenone	100	194.827	7.43326
Rotenone	200	158.257	7.14702
Rotenone	0	1701.26	28.9107
Rotenone	12.5	556.59	12.8845
Rotenone	25	280.68	8.88161
Rotenone	50	256.71	7.02878
Rotenone	100	159.942	6.7264
Rotenone	200	153.355	7.40829
Rotenone	0	1686.16	27.9736
Rotenone	12.5	471.974	11.961
Rotenone	25	292.209	8.5386
Rotenone	50	229.232	7.59812
Rotenone	100	152.054	6.98671
Rotenone	200	152.584	7.1701
Metformin	500000	1626.76	30.9104
Metformin	1000000	808.486	19.8708
Metformin	2000000	268.678	12.0507
Metformin	4000000	186.65	8.26084
Rotenone	200 + Pyr	3800.25	33.8332
Metformin	500000	1438.91	28.9589
Metformin	1000000	807.229	20.7665
Metformin	2000000	276.064	11.1195
Metformin	4000000	160.901	8.41505
Rotenone	200 + Pyr	2863.09	34.0019
Metformin	500000	1606.36	30.7134
Metformin	1000000	632.902	22.2188
Metformin	2000000	274.796	11.5002
Metformin	4000000	173.201	8.69759
Rotenone	200 + Pyr	2743.47	34.2487
